# Supplementary material for: New Sesquiterpene Glycosides from the Flowers of Aster koraiensis and Their Inhibition Activities on EGF- and TPA-Induced Cell Transformation
Source: MDPI journal article supplement (doi:10.3390/plants12081726), 2023-04-20

## Supporting Information for

### **New Sesquiterpene Glycosides from the Flowers of *Aster koraiensis* and their inhibition activities on EGF- and TPA-induced cell transformation**

*Young Hye. Seo,<sup>1,‡</sup> Ji-Young Kim,<sup>2,‡</sup> Seung Mok Ryu,<sup>1</sup> Sun-Young Hwang,<sup>3</sup> Mee-Hyun Lee,<sup>3</sup> Nahyun Kim,<sup>4</sup> Hojun Son,<sup>5</sup> A Yeong Lee,<sup>1</sup> Hyo Seon Kim,<sup>1</sup> Byeong Cheol Moon,<sup>1</sup> Dae Sik Jang,<sup>2,\*</sup> and Jun Lee<sup>1,\*</sup>*

<sup>1</sup>Herbal Medicine Resources Research Center, Korea Institute of Oriental Medicine (KIOM), Naju 58245, Republic of Korea

<sup>2</sup>Department of Biomedical and Pharmaceutical Sciences, Graduate School, Kyung Hee University, Seoul 02447, Republic of Korea

<sup>3</sup>College of Korean Medicine, Dongshin University, Naju 58245, Republic of Korea

<sup>4</sup>Division of Forest Industrial Materials, Department of Forest Products and Industry, National Institute of Forest Science, Seoul 02455, Republic of Korea

<sup>5</sup>Forest Medicinal Resources Research Center (FMRRC), National Institute of Forest Science, Yeongju 36040, Republic of Korea

Figure S1. HRESIMS spectrum of the new compound **1**.

Figure S2.  $^1\text{H}$  NMR spectrum (600 MHz, methanol- $d_4$ ) of the new compound **1**.

Figure S3.  $^{13}\text{C}$  NMR spectrum (150 MHz, methanol- $d_4$ ) of the new compound **1**.

Figure S4. HSQC spectrum (600 MHz, methanol- $d_4$ ) of the new compound **1**.

Figure S5. HMBC spectrum (600 MHz, methanol- $d_4$ ) of the new compound **1**.

Figure S6. COSY spectrum (600 MHz, methanol- $d_4$ ) of the new compound **1**.

Figure S7. NOESY spectrum (600 MHz, methanol- $d_4$ ) of the new compound **1**.

Figure S8. HRESIMS spectrum of the new compound **2**.

Figure S9.  $^1\text{H}$  NMR spectrum (600 MHz, methanol- $d_4$ ) of the new compound **2**.

Figure S10.  $^{13}\text{C}$  NMR spectrum (150 MHz, methanol- $d_4$ ) of the new compound **2**.

Figure S11. HSQC spectrum (600 MHz, methanol- $d_4$ ) of the new compound **2**.

Figure S12. HMBC spectrum (600 MHz, methanol- $d_4$ ) of the new compound **2**.

Figure S13. COSY spectrum (600 MHz, methanol- $d_4$ ) of the new compound **2**.

Figure S14. NOESY spectrum (600 MHz, methanol- $d_4$ ) of the new compound **2**.

Figure S15.  $^1\text{H}$  NMR spectrum (700 MHz, DMSO- $d_6$ ) of the new compound **2**.

Figure S16.  $^{13}\text{C}$  NMR spectrum (175 MHz, DMSO- $d_6$ ) of the new compound **2**.

Figure S17. HSQC spectrum (700 MHz, DMSO- $d_6$ ) of the new compound **2**.

Figure S18. HMBC spectrum (700 MHz, DMSO- $d_6$ ) of the new compound **2**.

Figure S19. COSY spectrum (700 MHz, DMSO- $d_6$ ) of the new compound **2**.

Figure S20. HRESIMS spectrum of the new compound **3**.

Figure S21.  $^1\text{H}$  NMR spectrum (600 MHz, methanol- $d_4$ ) of the new compound **3**.

Figure S22.  $^{13}\text{C}$  NMR spectrum (150 MHz, methanol- $d_4$ ) of the new compound **3**.

Figure S23. HSQC spectrum (600 MHz, methanol- $d_4$ ) of the new compound **3**.

Figure S24. HMBC spectrum (600 MHz, methanol- $d_4$ ) of the new compound **3**.

Figure S25. COSY spectrum (600 MHz, methanol- $d_4$ ) of the new compound **3**.

Figure S26. NOESY spectrum (600 MHz, methanol-*d*<sub>4</sub>) of the new compound **3**.

Figure S27. HRESIMS spectrum of the new compound **4**.

Figure S28. <sup>1</sup>H NMR spectrum (600 MHz, methanol-*d*<sub>4</sub>) of the new compound **4**.

Figure S29. <sup>13</sup>C NMR spectrum (150 MHz, methanol-*d*<sub>4</sub>) of the new compound **4**.

Figure S30. HSQC spectrum (600 MHz, methanol-*d*<sub>4</sub>) of the new compound **4**.

Figure S31. HMBC spectrum (600 MHz, methanol-*d*<sub>4</sub>) of the new compound **4**.

Figure S32. COSY spectrum (600 MHz, methanol-*d*<sub>4</sub>) of the new compound **4**.

Figure S33. NOESY spectrum (600 MHz, methanol-*d*<sub>4</sub>) of the new compound **4**.

Figure S1. HRESIMS spectrum of the new compound **1**.

Tolerance = 5.0 PPM / DBE: min = -1.5, max = 20.0

Element prediction: Off

Number of isotope peaks used for i-FIT = 5

Monoisotopic Mass, Even Electron Ions

199 formula(e) evaluated with 1 results within limits (up to 20 closest results for each mass)

Elements Used:

C: 0-100 H: 0-200 O: 0-50 Na: 0-1

20191216\_SeoYH\_Gyko7F-J18\_pos\_re 207 (2.326)

1: TOF MS ES+

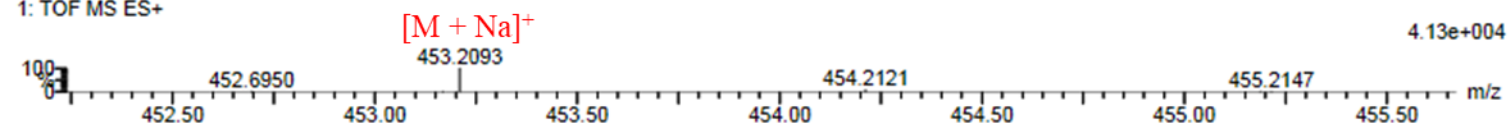

Minimum: 15.00  
Maximum: 100.00

| Mass | RA | Calc. Mass | mDa | PPM | DBE | i-FIT | Norm | Conf(%) | Formula |
|------|----|------------|-----|-----|-----|-------|------|---------|---------|
|------|----|------------|-----|-----|-----|-------|------|---------|---------|

|          |        |          |      |      |     |      |     |     |               |
|----------|--------|----------|------|------|-----|------|-----|-----|---------------|
| 453.2093 | 100.00 | 453.2101 | -0.8 | -1.8 | 4.5 | 43.0 | n/a | n/a | C21 H34 O9 Na |
|----------|--------|----------|------|------|-----|------|-----|-----|---------------|

Figure S2.  $^1\text{H}$  NMR spectrum (600 MHz, methanol- $d_4$ ) of the new compound **1**.

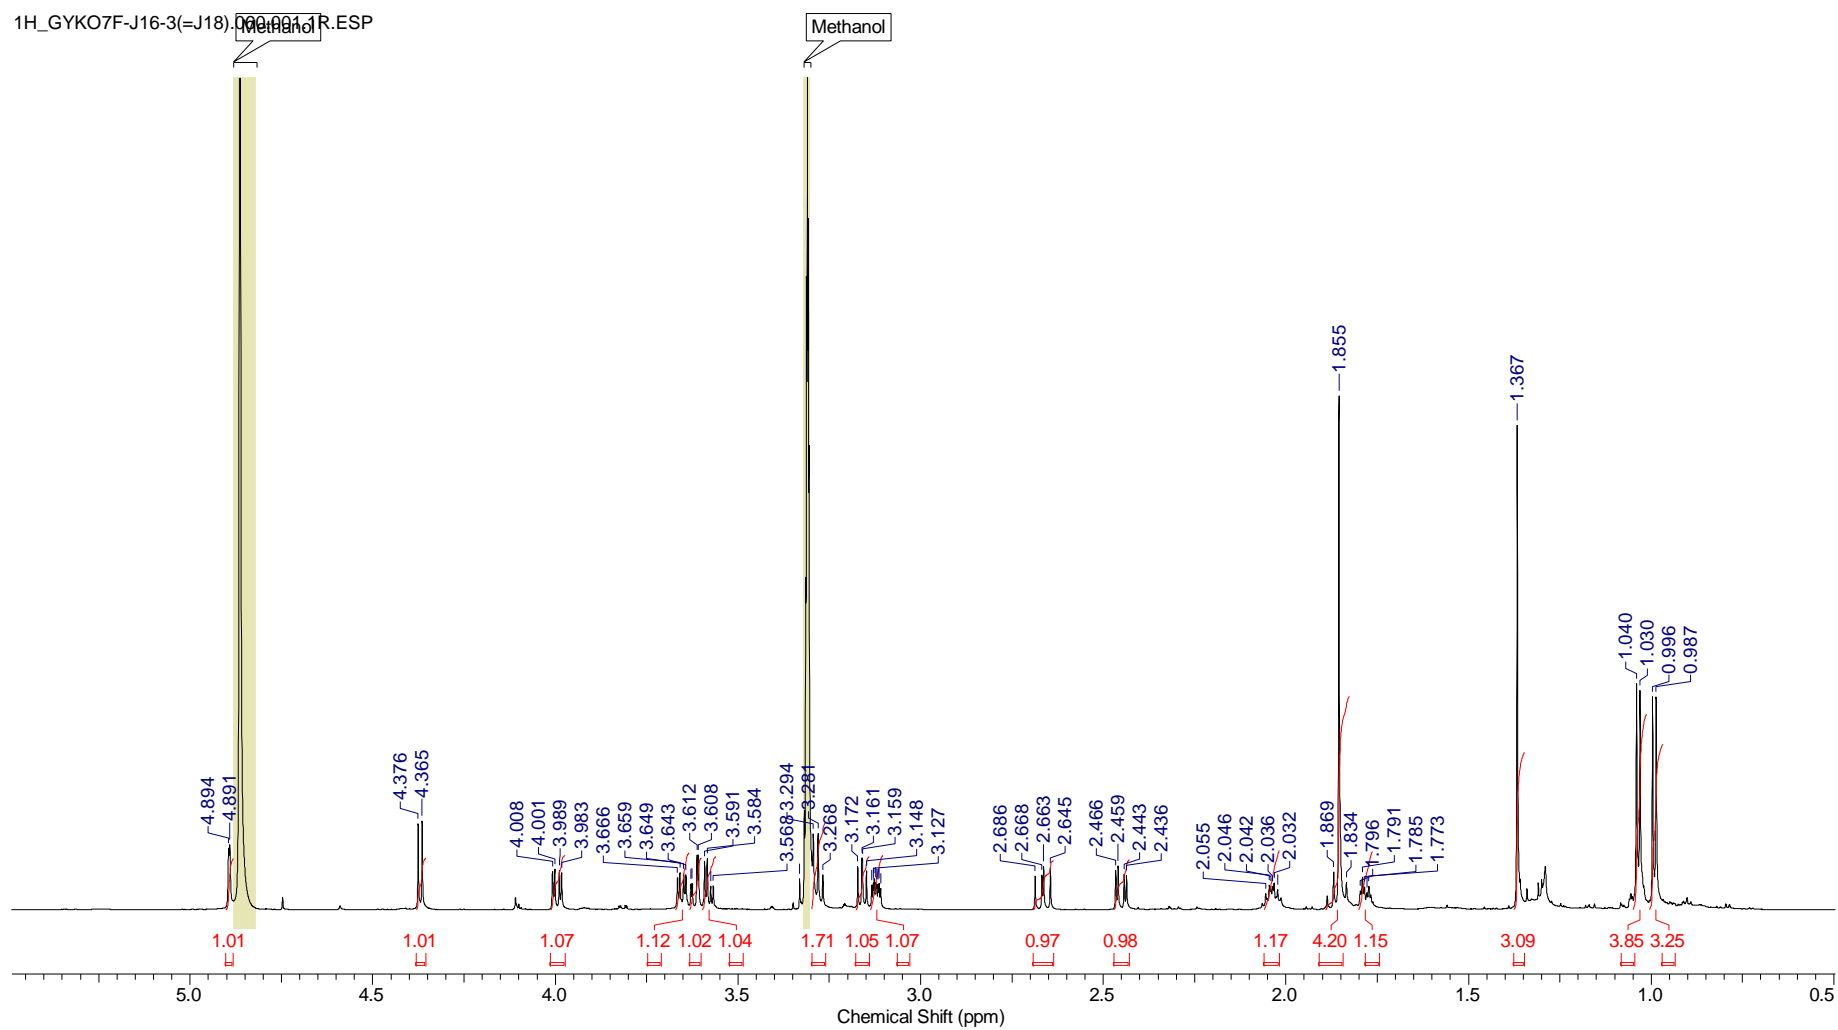

Figure S3.  $^{13}\text{C}$  NMR spectrum (150 MHz, methanol- $d_4$ ) of the new compound **1**.

13C\_GYKO7F-J16-3(=J18).061.001.1R.ESP

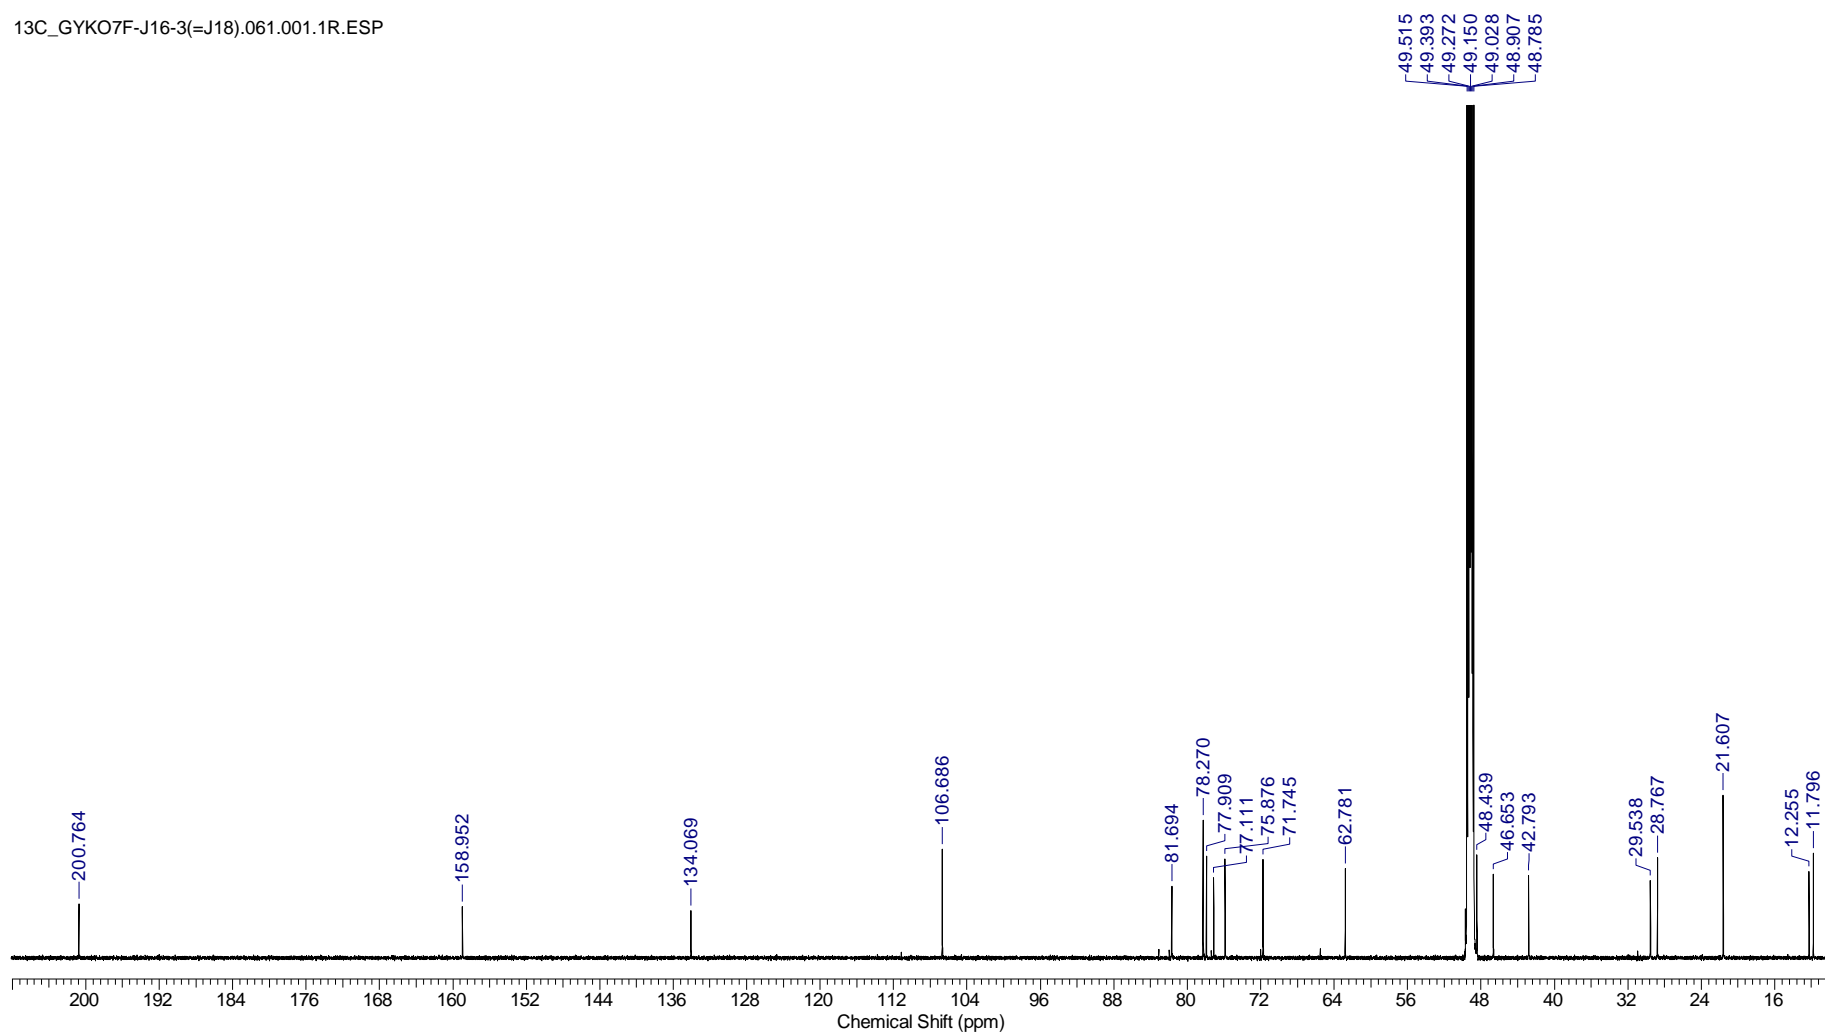

Figure S4. HSQC spectrum (600 MHz, methanol- $d_4$ ) of the new compound **1**.

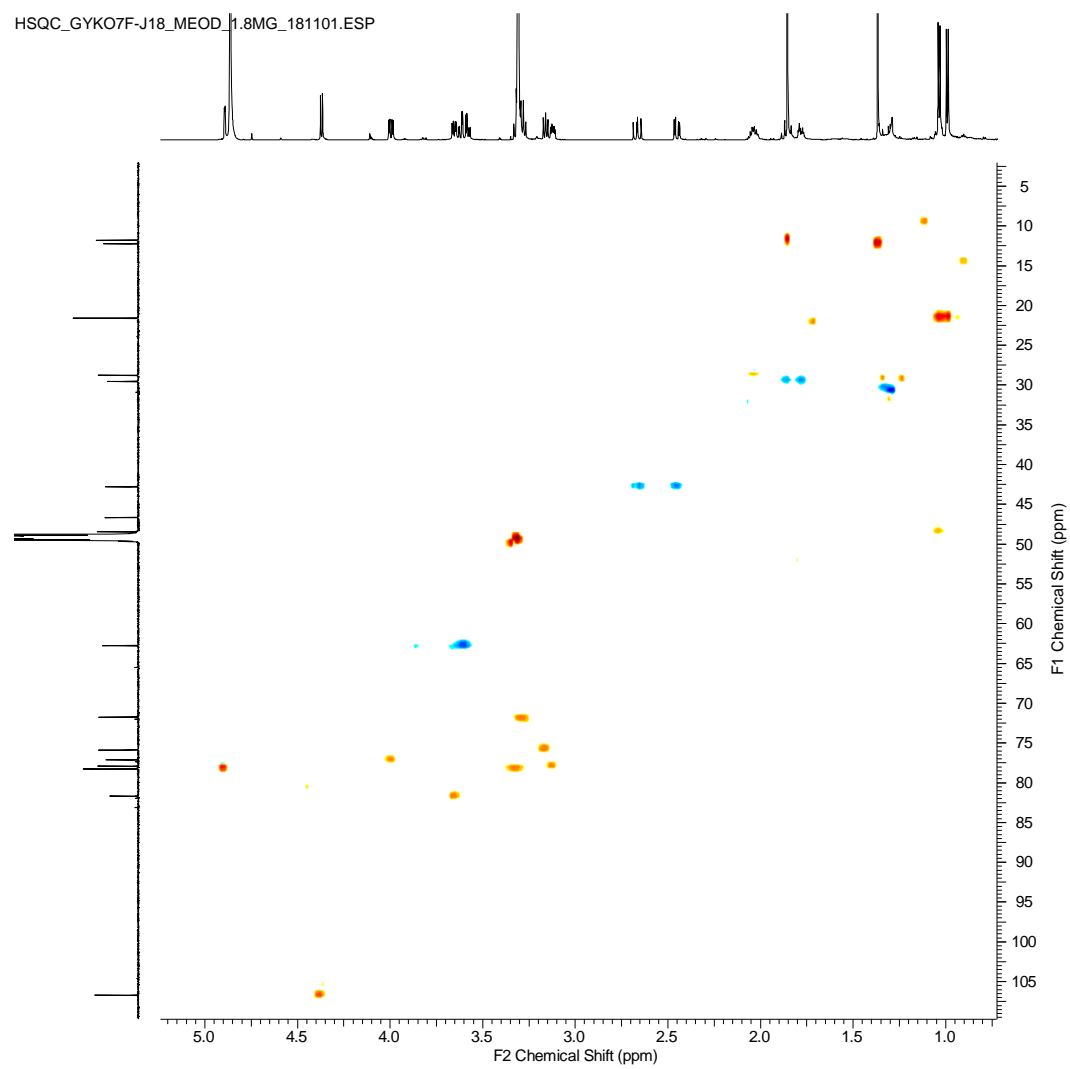

Figure S5. HMBC spectrum (600 MHz, methanol-*d*<sub>4</sub>) of the new compound **1**.

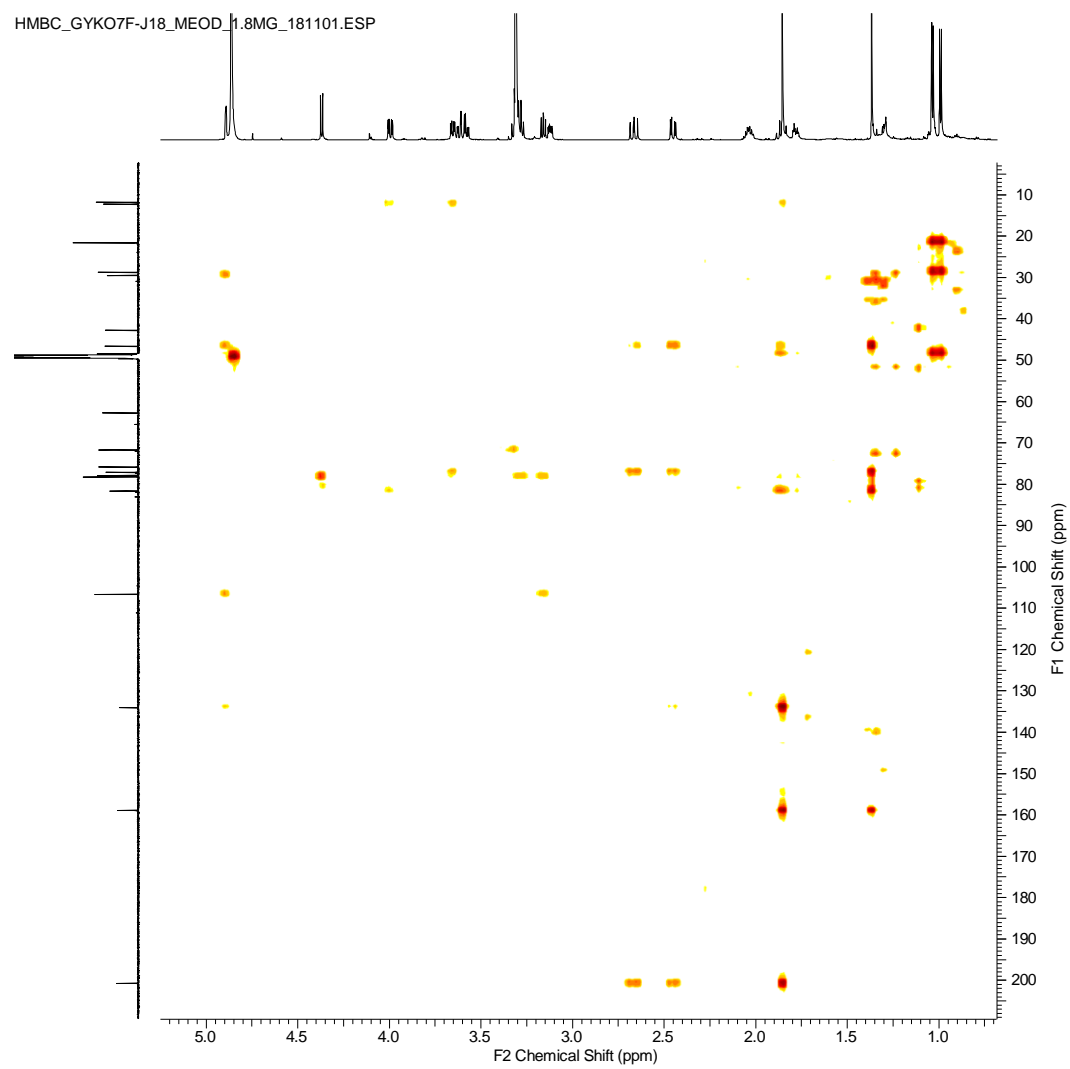



Figure S6. COSY spectrum (600 MHz, methanol-*d*<sub>4</sub>) of the new compound **1**.

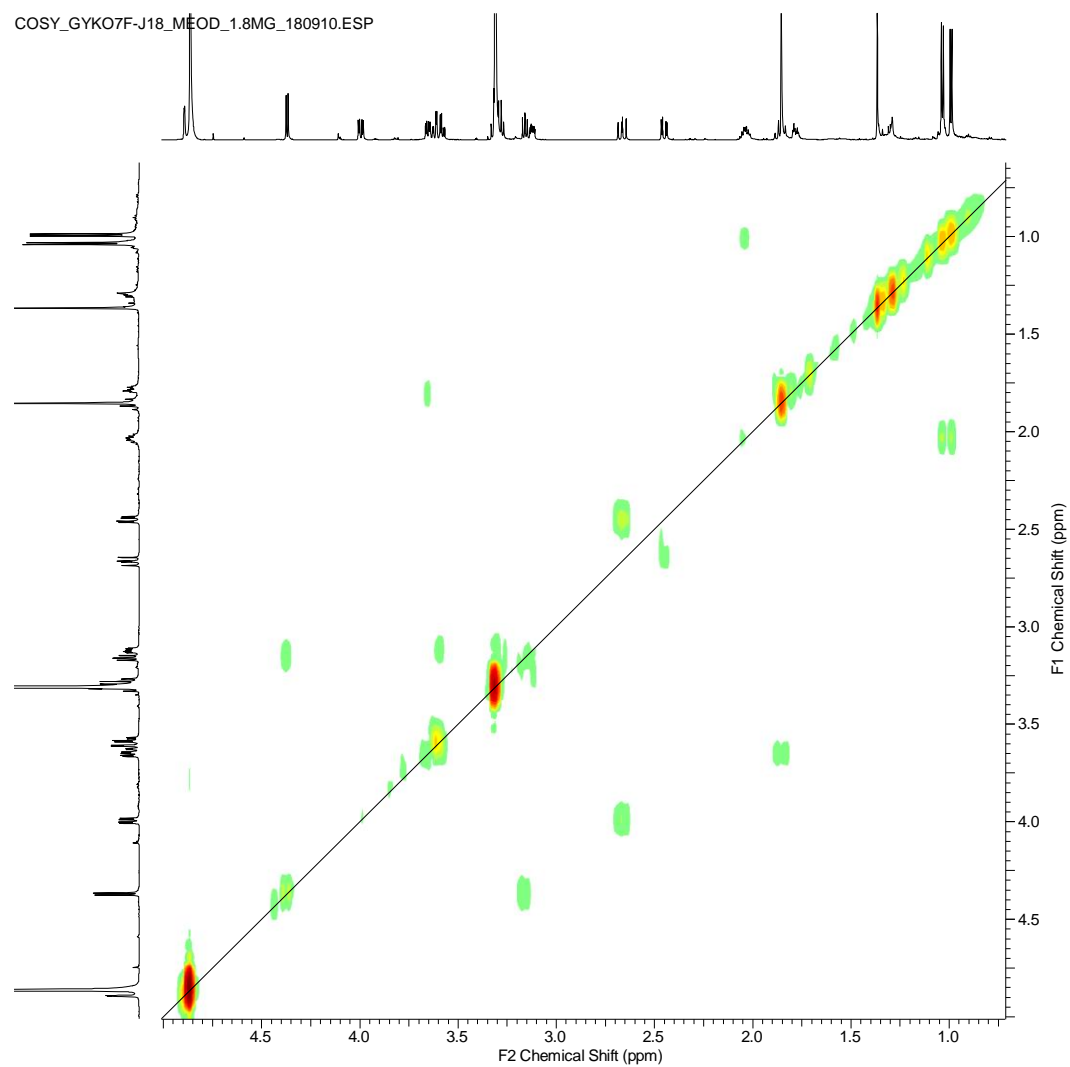

Figure S7. NOESY spectrum (600 MHz, methanol- $d_4$ ) of the new compound **1**.

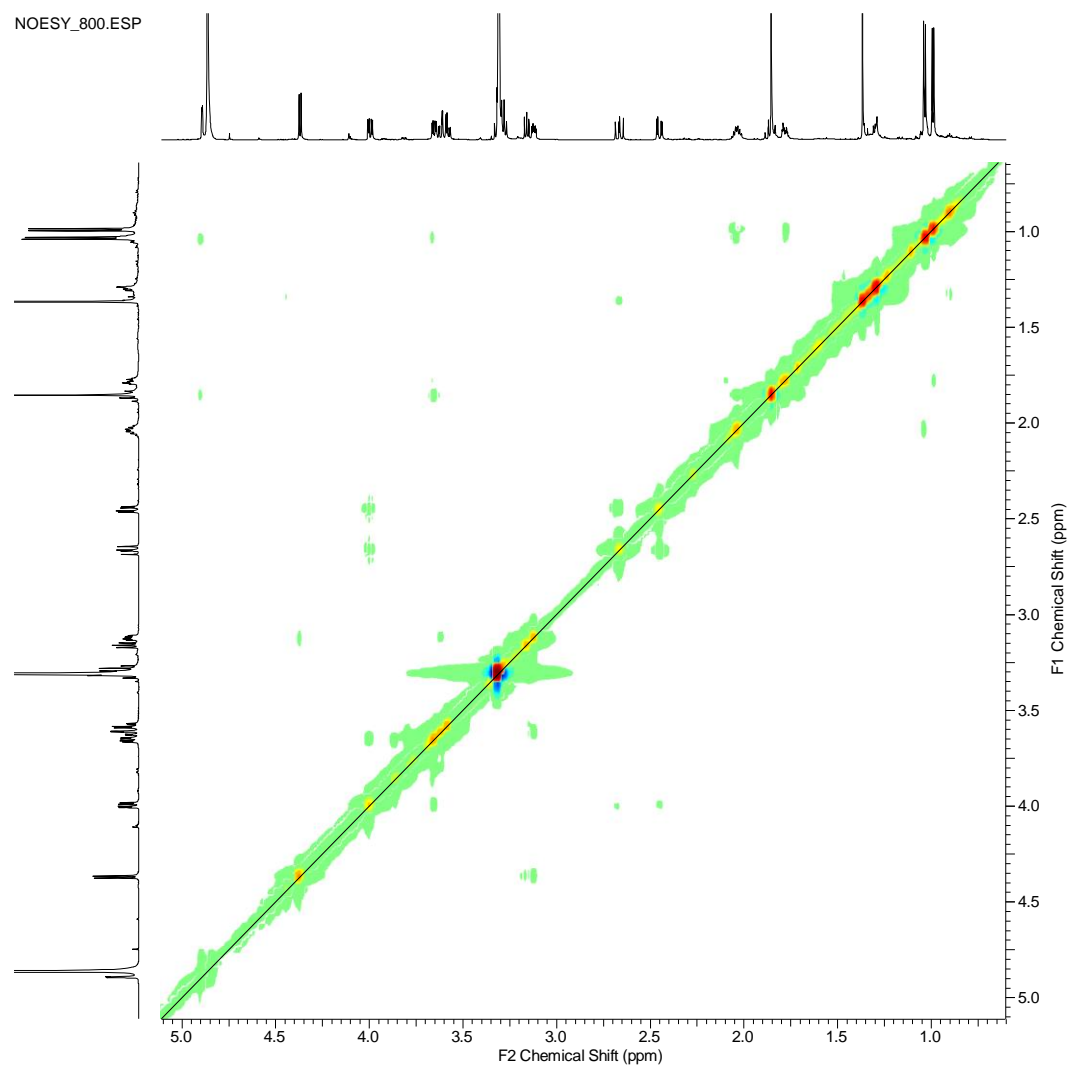

Figure S8. HRESIMS spectrum of the new compound **2**.

**Multiple Mass Analysis: 4 mass(es) processed**

Tolerance = 5.0 mDa / DBE: min = -1.5, max = 50.0

Element prediction: Off

Number of isotope peaks used for i-FIT = 3

Monoisotopic Mass, Even Electron Ions

927 formula(e) evaluated with 4 results within limits (up to 50 best isotopic matches for each mass)

Elements Used:

C: 0-500 H: 0-1000 O: 0-200

20191216\_SeoYH\_Gyko7F-J22\_pos 328 (3.685) Cm (327:331)

1: TOF MS ES+

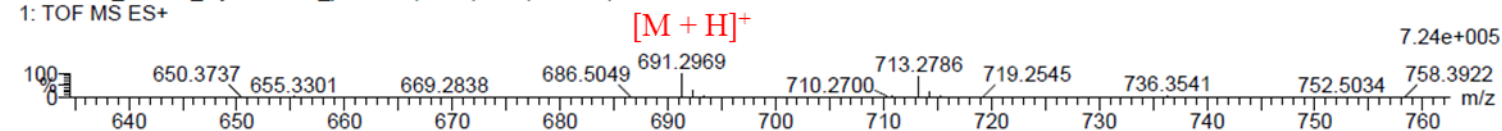

Minimum: 15.00

Maximum: 100.00

| Mass     | RA     | Calc. Mass | mDa  | PPM  | DBE  | i-FIT | Norm  | Conf(%) | Formula     |
|----------|--------|------------|------|------|------|-------|-------|---------|-------------|
| 691.2969 | 100.00 | 691.2966   | 0.3  | 0.4  | 12.5 | 102.6 | 0.024 | 97.68   | C35 H47 O14 |
|          |        | 691.3001   | -3.2 | -4.6 | 34.5 | 106.4 | 3.761 | 2.32    | C53 H39 O   |
| 692.3008 | 28.64  | ---        |      |      |      |       |       |         |             |
| 713.2786 | 85.06  | 713.2809   | -2.3 | -3.2 | 15.5 | 121.6 | 0.282 | 75.42   | C37 H45 O14 |
|          |        | 713.2751   | 3.5  | 4.9  | 24.5 | 122.7 | 1.403 | 24.58   | C44 H41 O9  |
| 714.2817 | 22.36  | ---        |      |      |      |       |       |         |             |

Figure S9.  $^1\text{H}$  NMR spectrum (600 MHz, methanol- $d_4$ ) of the new compound **2**.

1H\_GYKO7F-J22\_MEOD\_181019.ESP

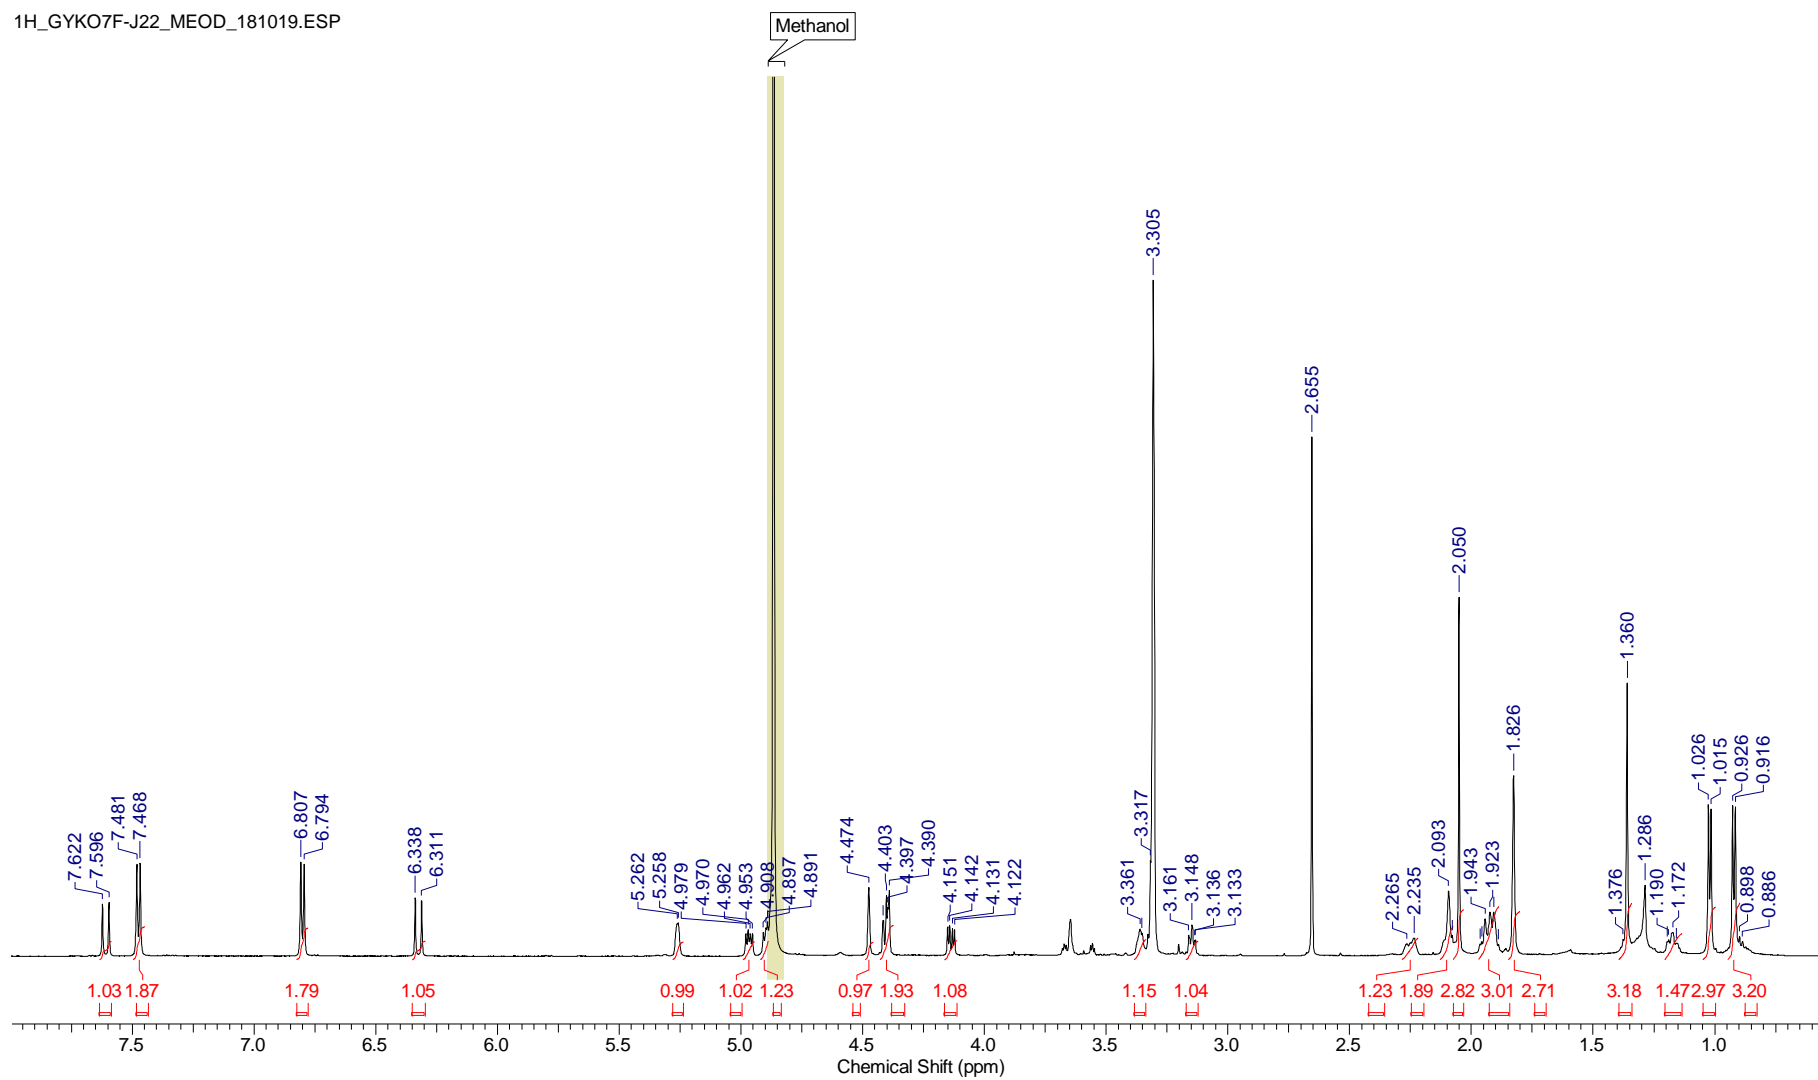

Figure S10.  $^{13}\text{C}$  NMR spectrum (150 MHz, methanol- $d_4$ ) of the new compound **2**.

13C\_GYKO7F-J22\_MEOD\_3.ESP

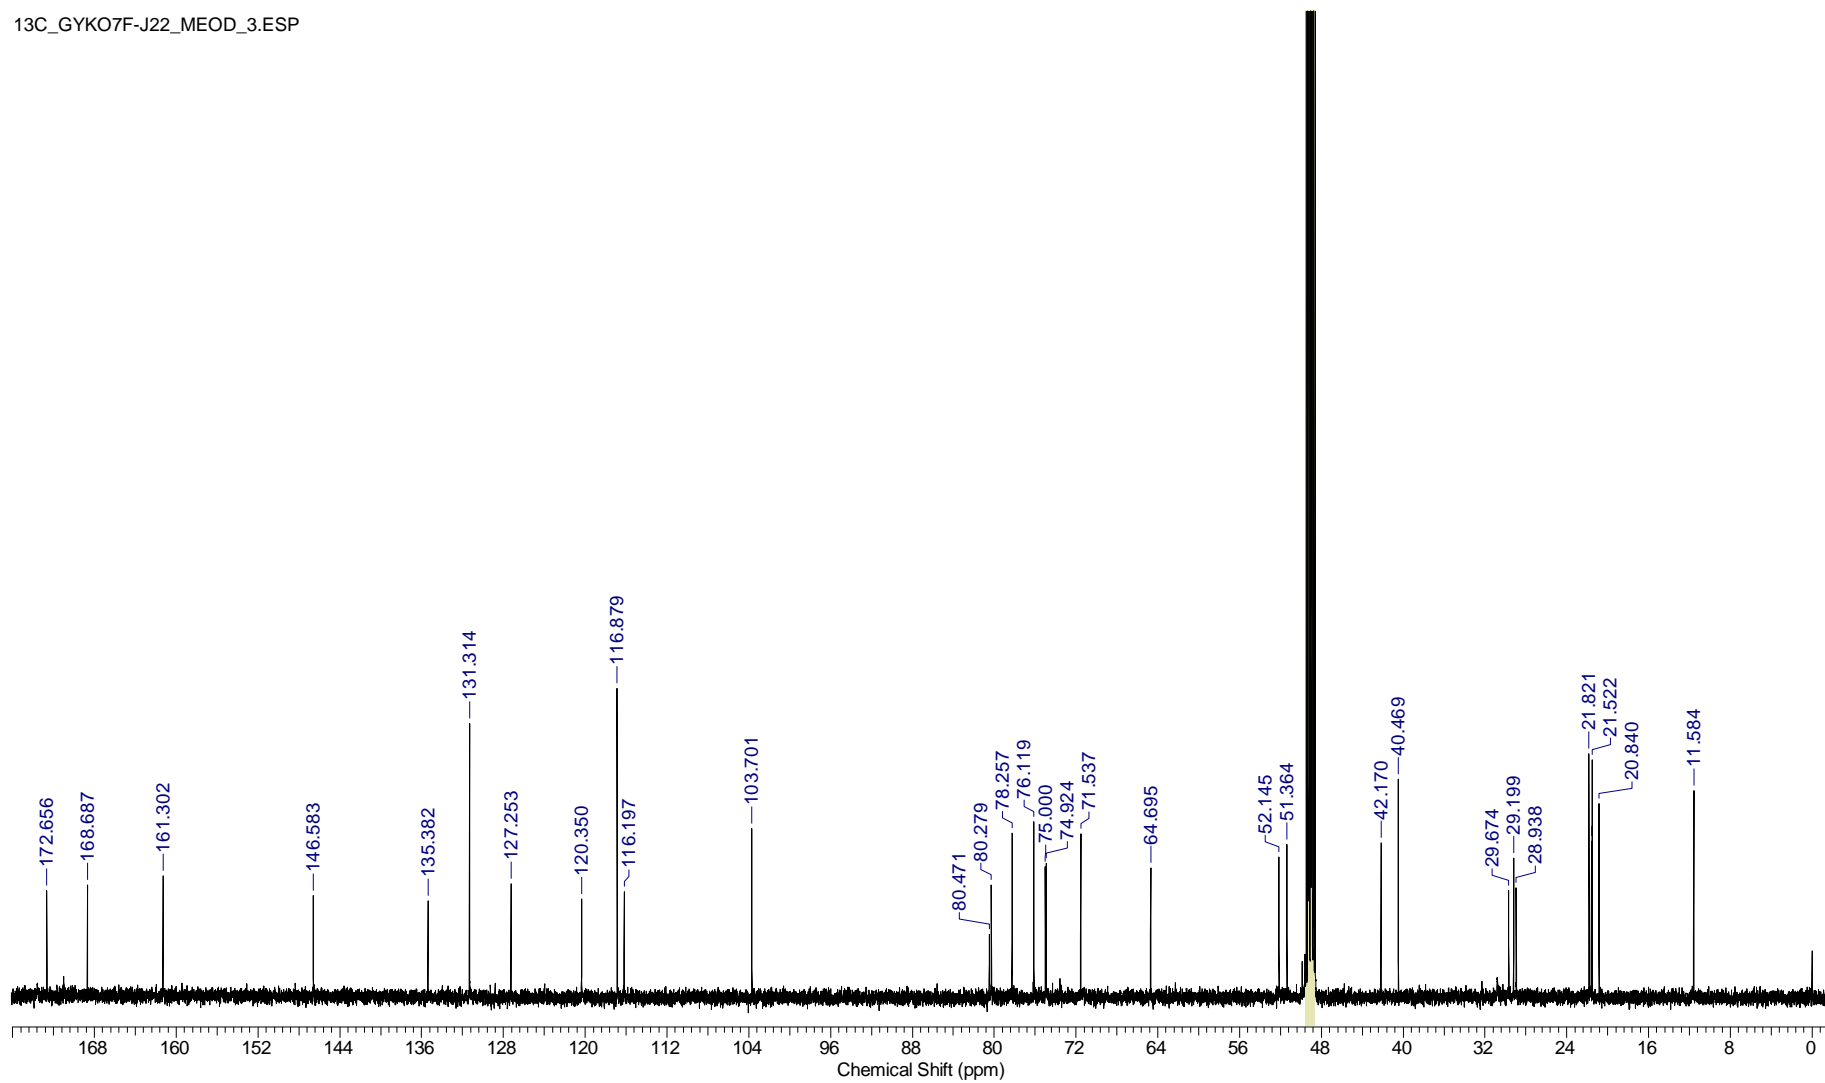

Figure S11. HSQC spectrum (600 MHz, methanol-*d*<sub>4</sub>) of the new compound **2**.

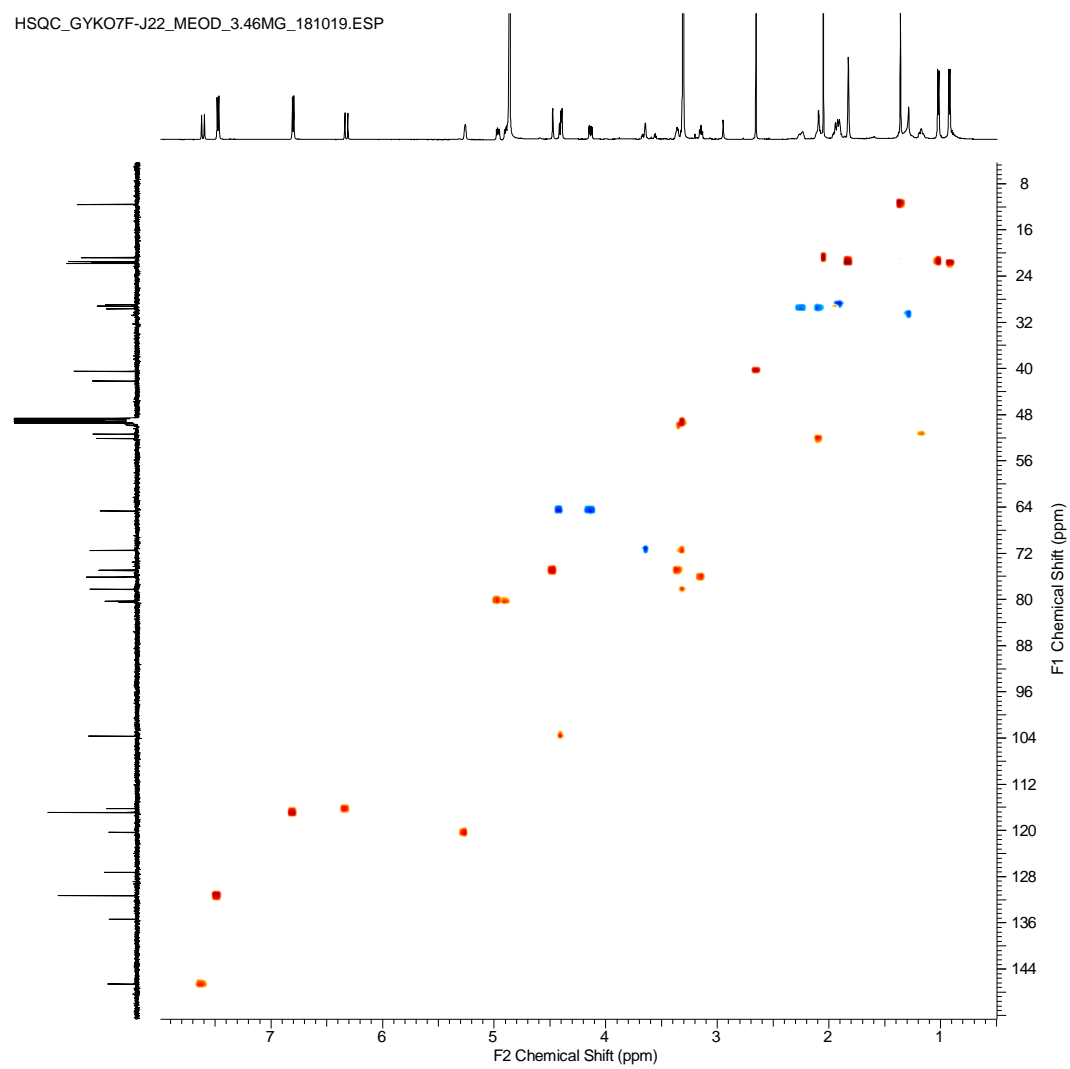

Figure S12. HMBC spectrum (600 MHz, methanol- $d_4$ ) of the new compound **2**.

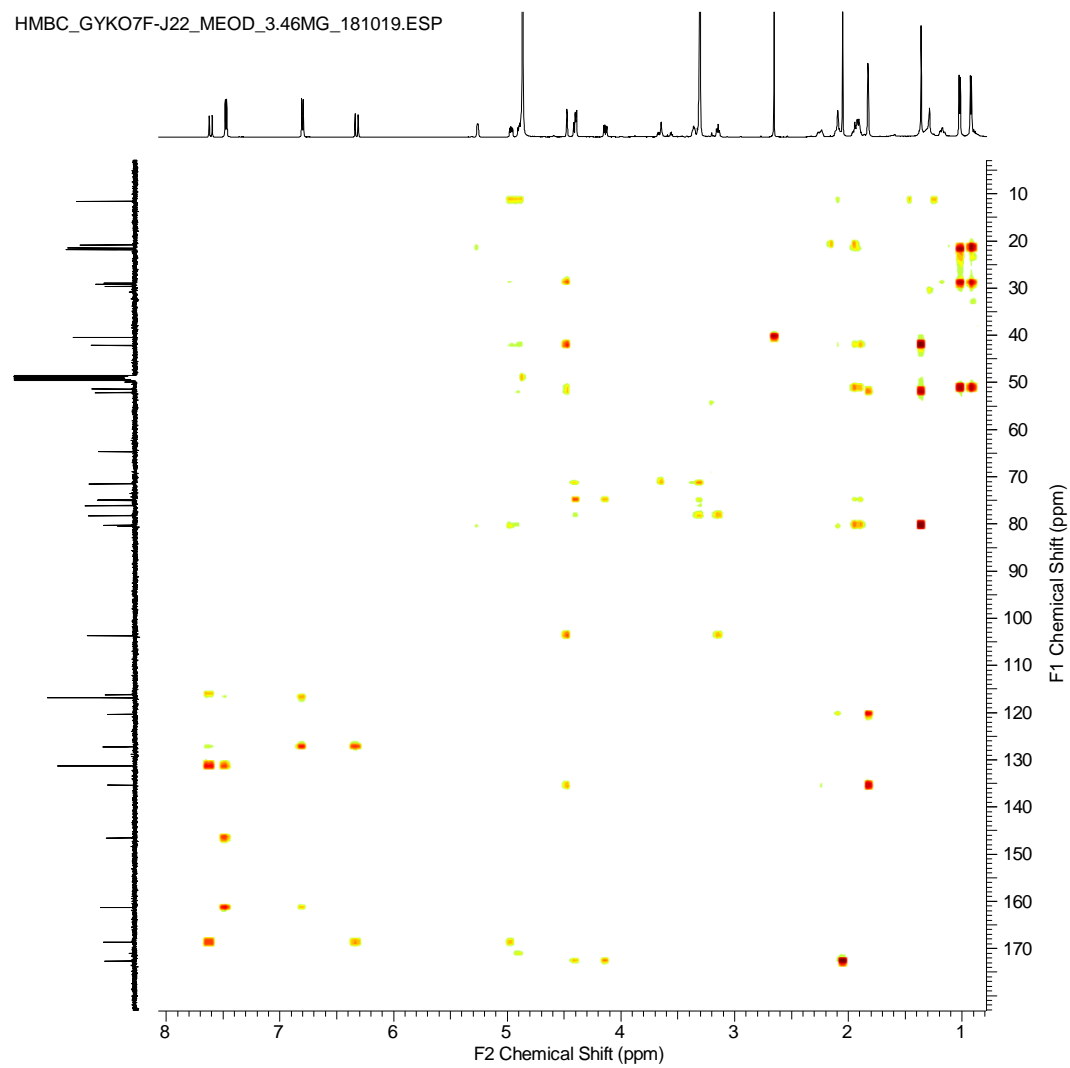

Figure S13. COSY spectrum (600 MHz, methanol- $d_4$ ) of the new compound **2**.

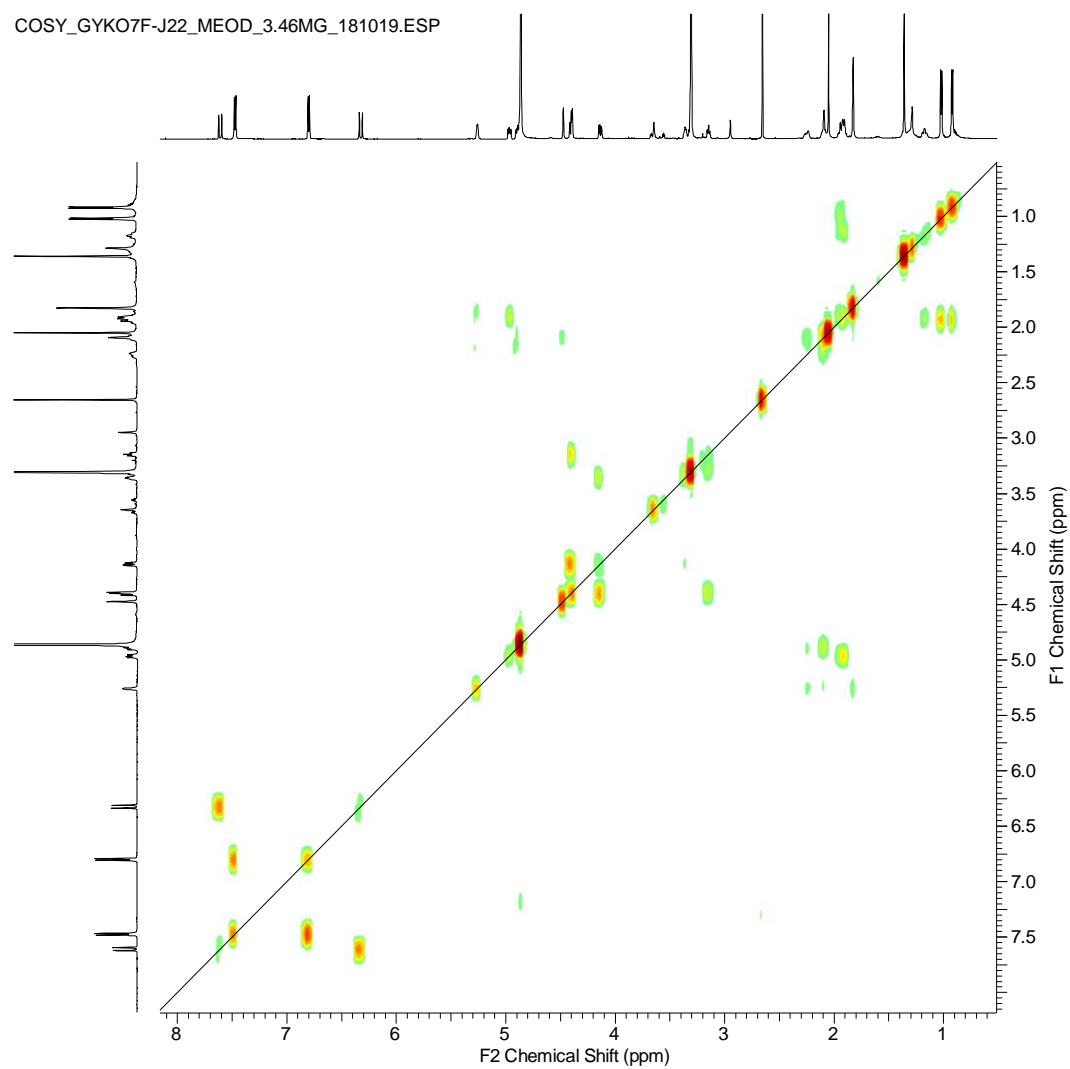



Figure S14. NOESY spectrum (600 MHz, methanol- $d_4$ ) of the new compound **2**.

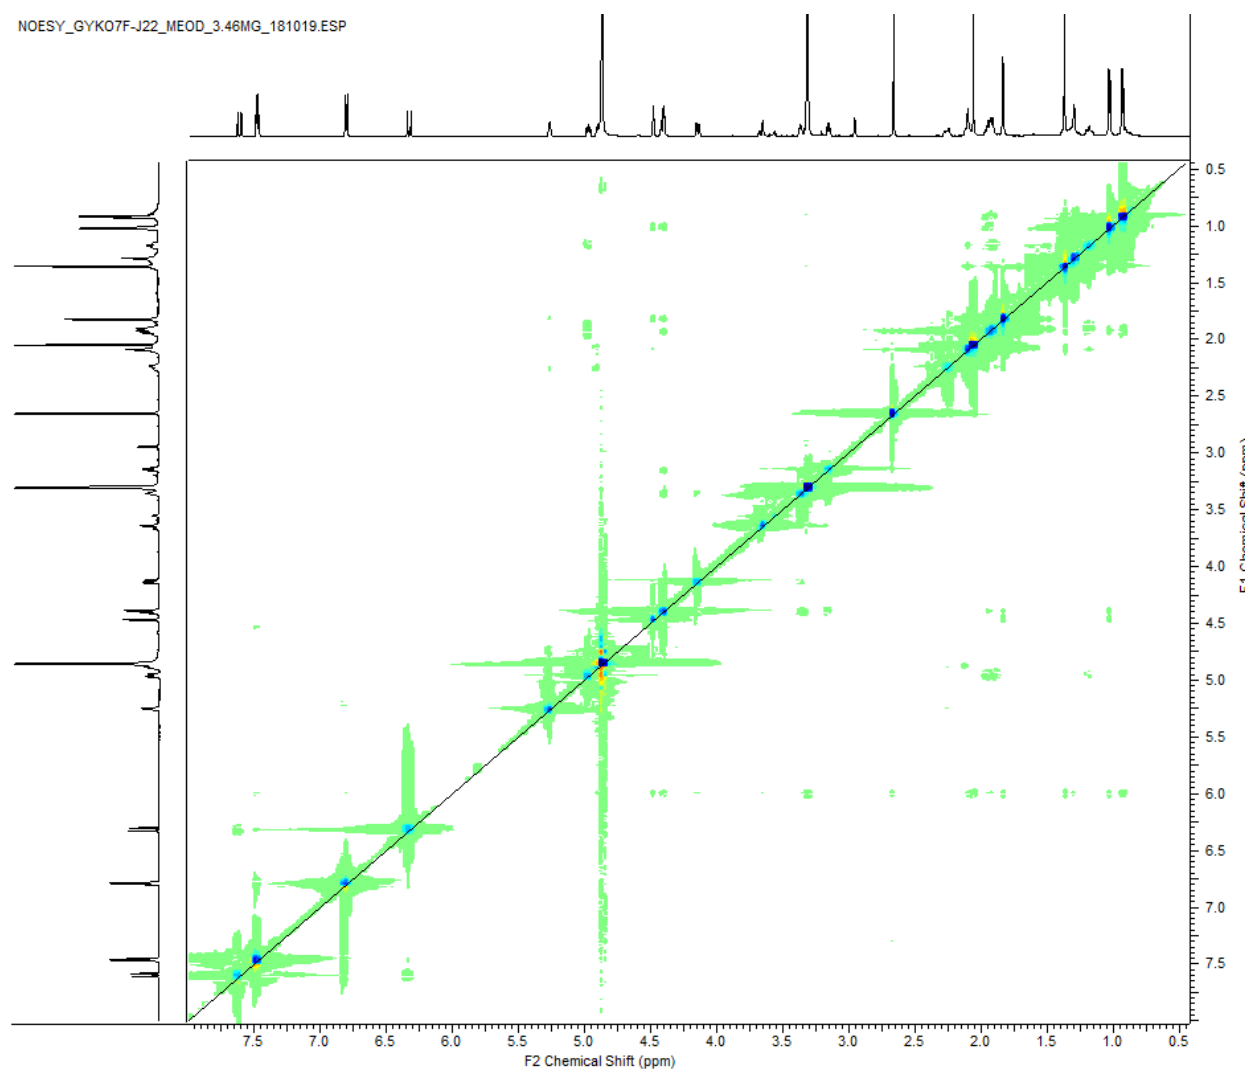

Figure S15.  $^1\text{H}$  NMR spectrum (700 MHz,  $\text{DMSO-}d_6$ ) of the new compound **2**.

1H\_J22\_DMSO.ESP

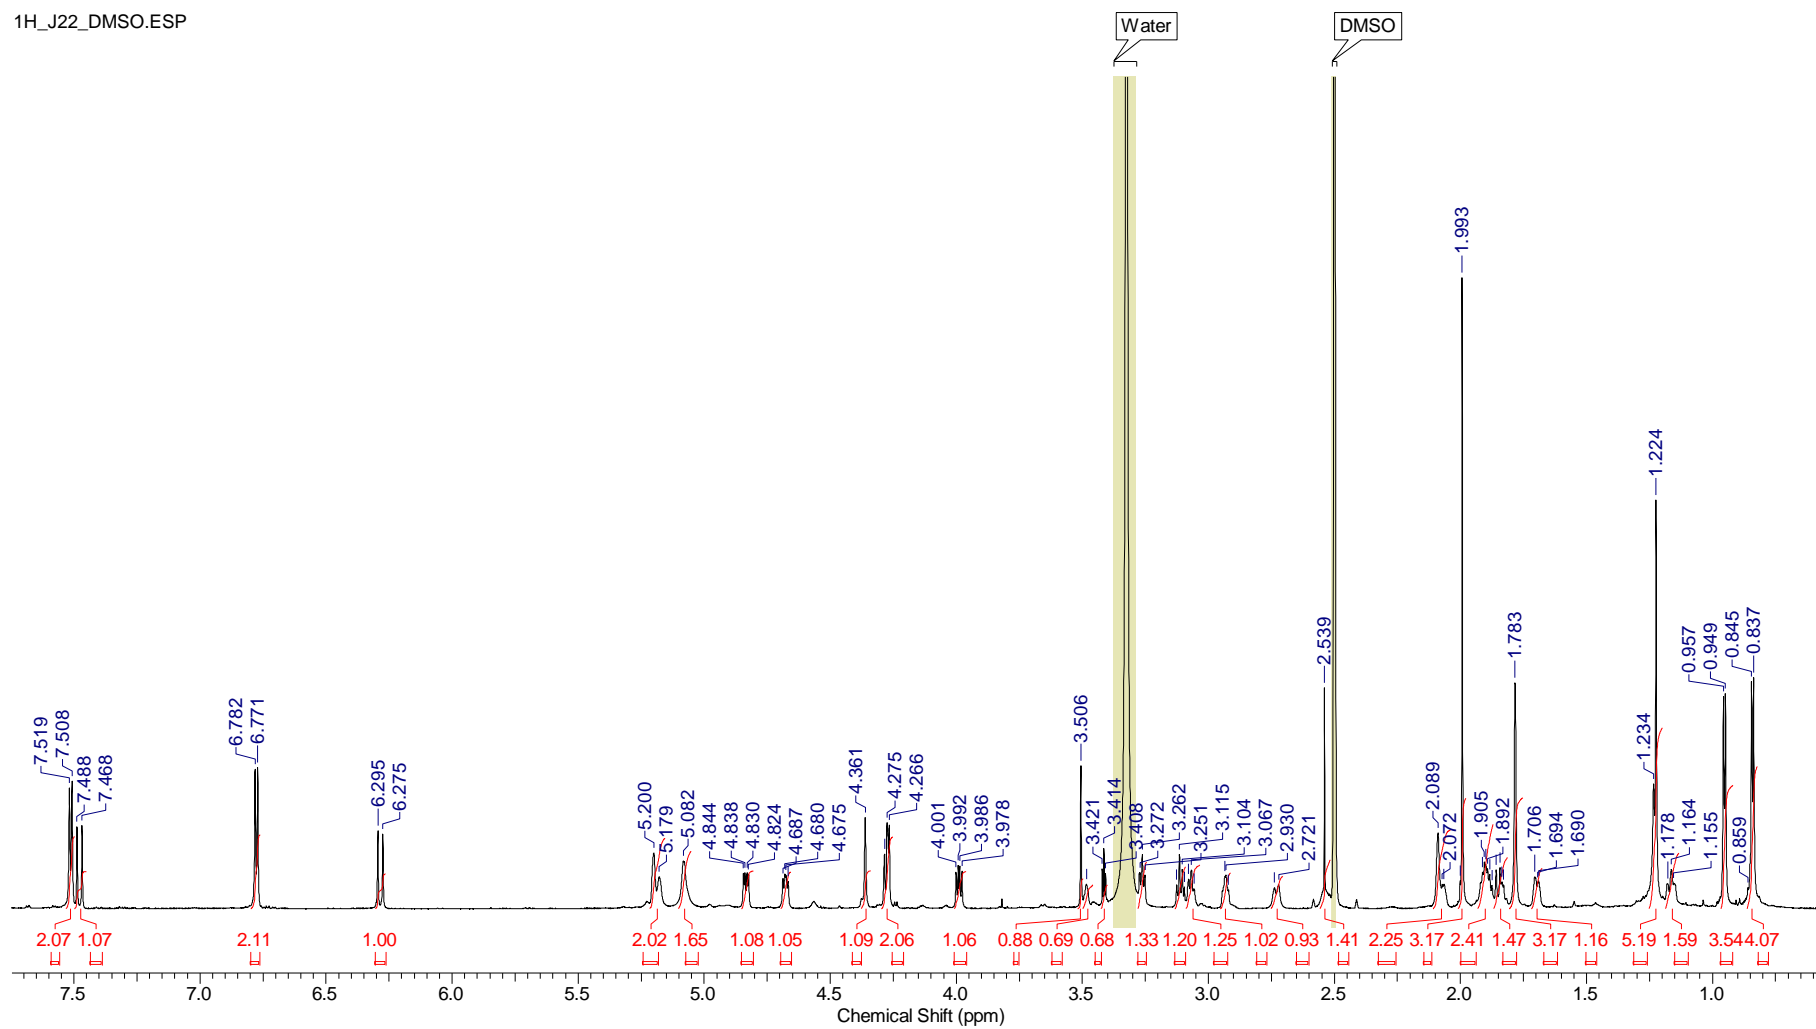

Figure S16.  $^{13}\text{C}$  NMR spectrum (175 MHz,  $\text{DMSO}-d_6$ ) of the new compound **2**.

13C\_J22\_DMSO.ESP

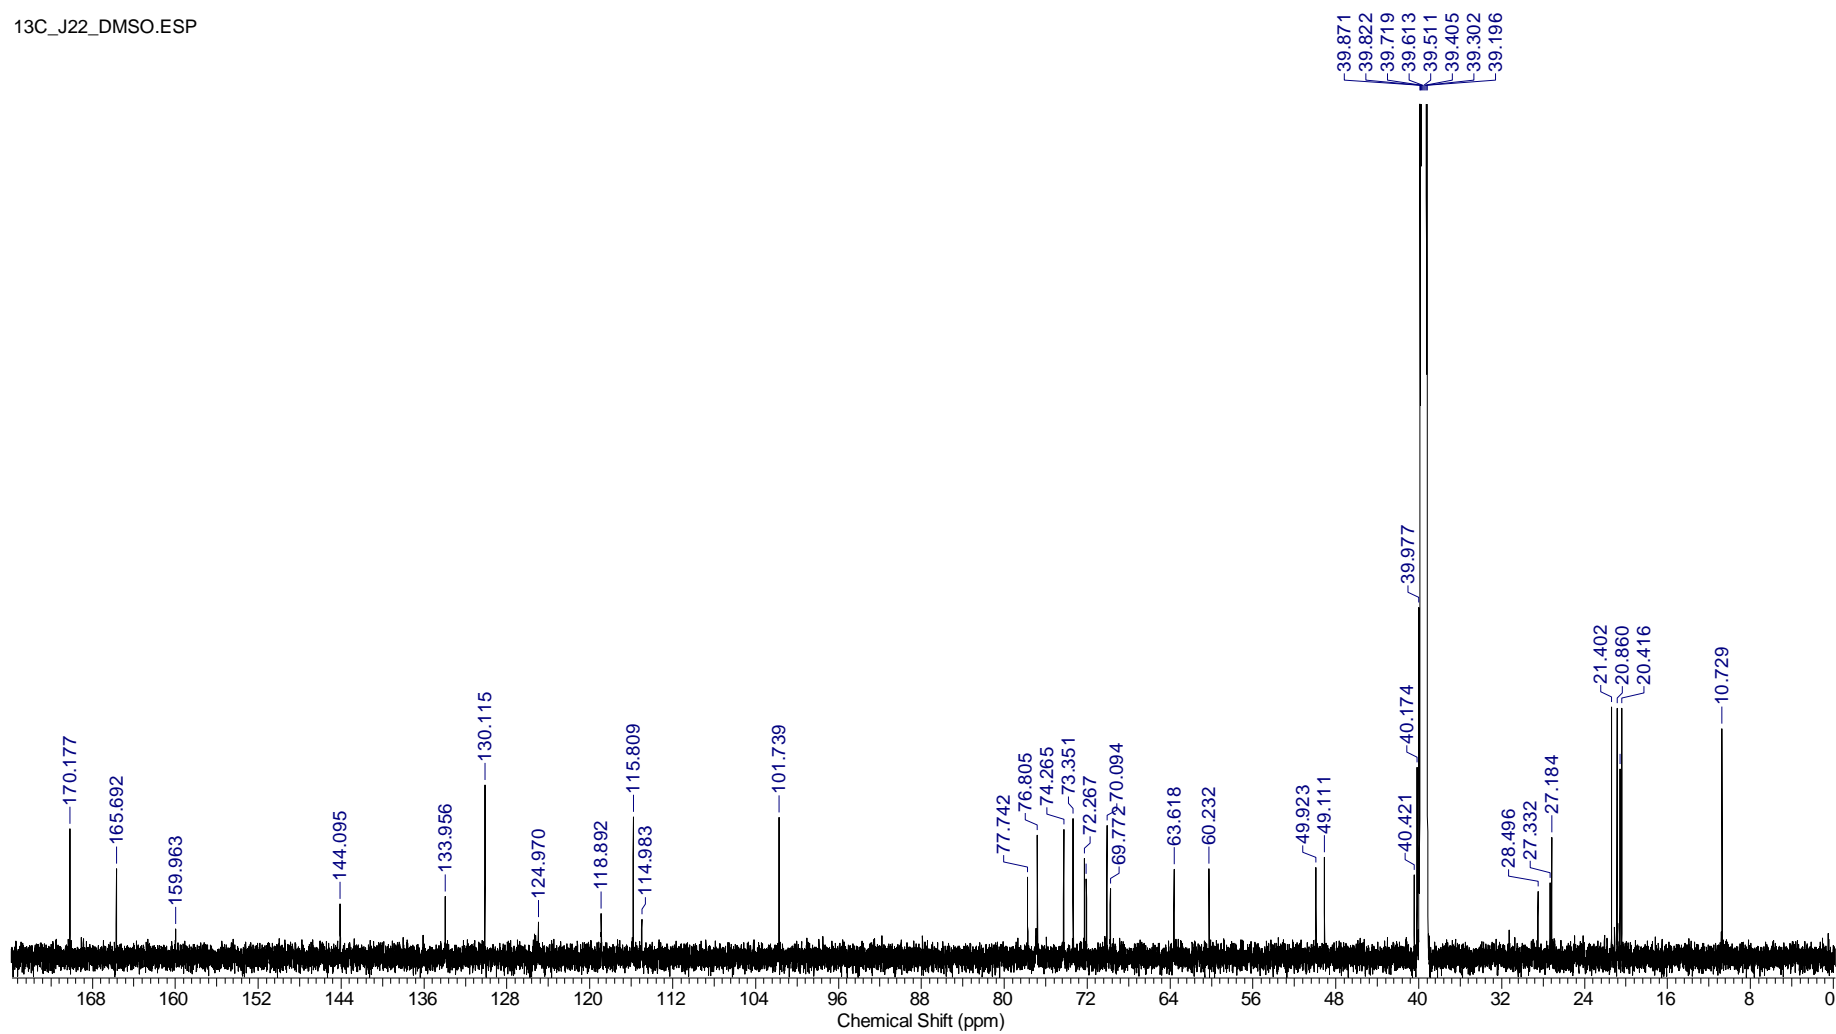

Figure S17. HSQC spectrum (700 MHz, DMSO-*d*<sub>6</sub>) of the new compound **2**.

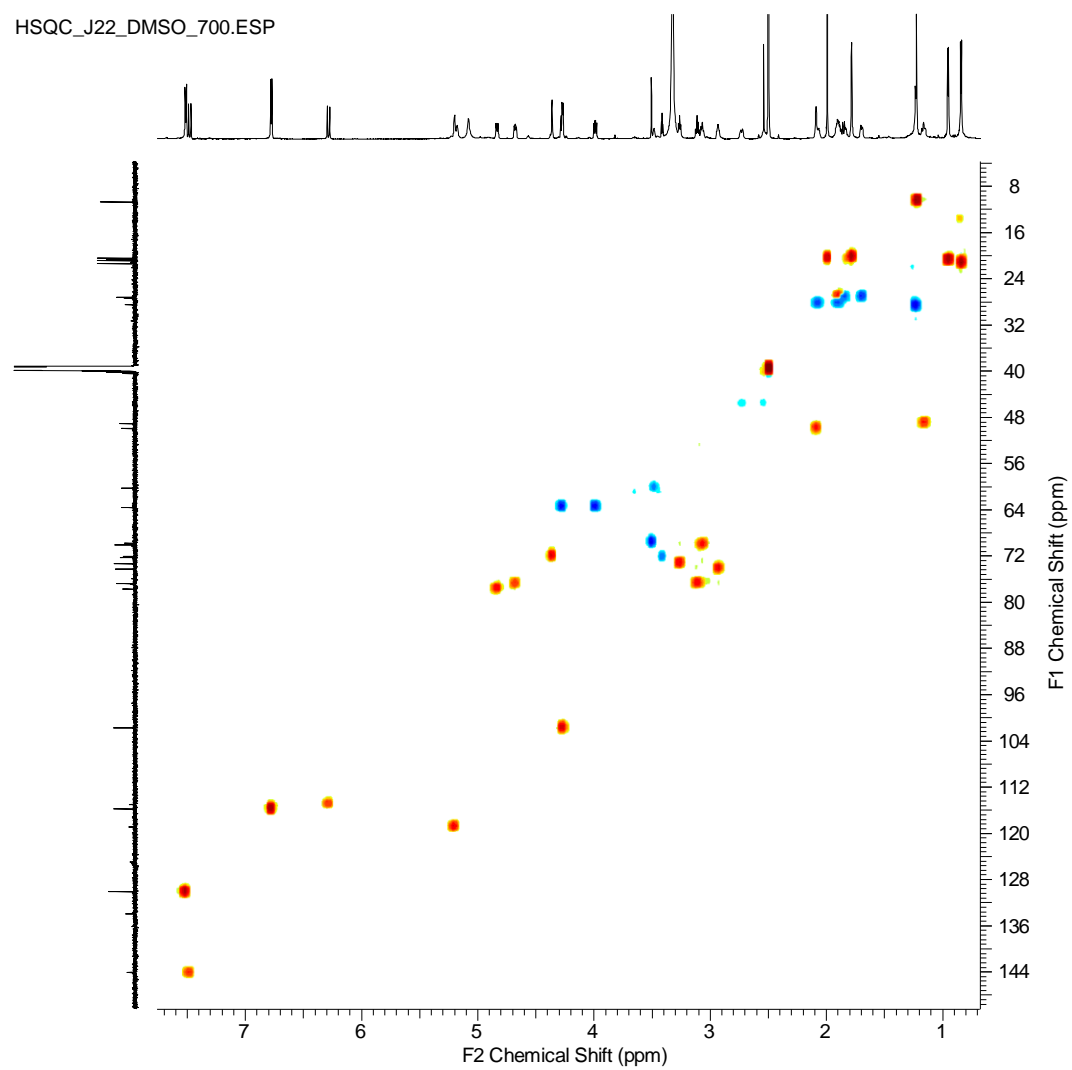

Figure S18. HMBC spectrum (700 MHz, DMSO- $d_6$ ) of the new compound **2**.

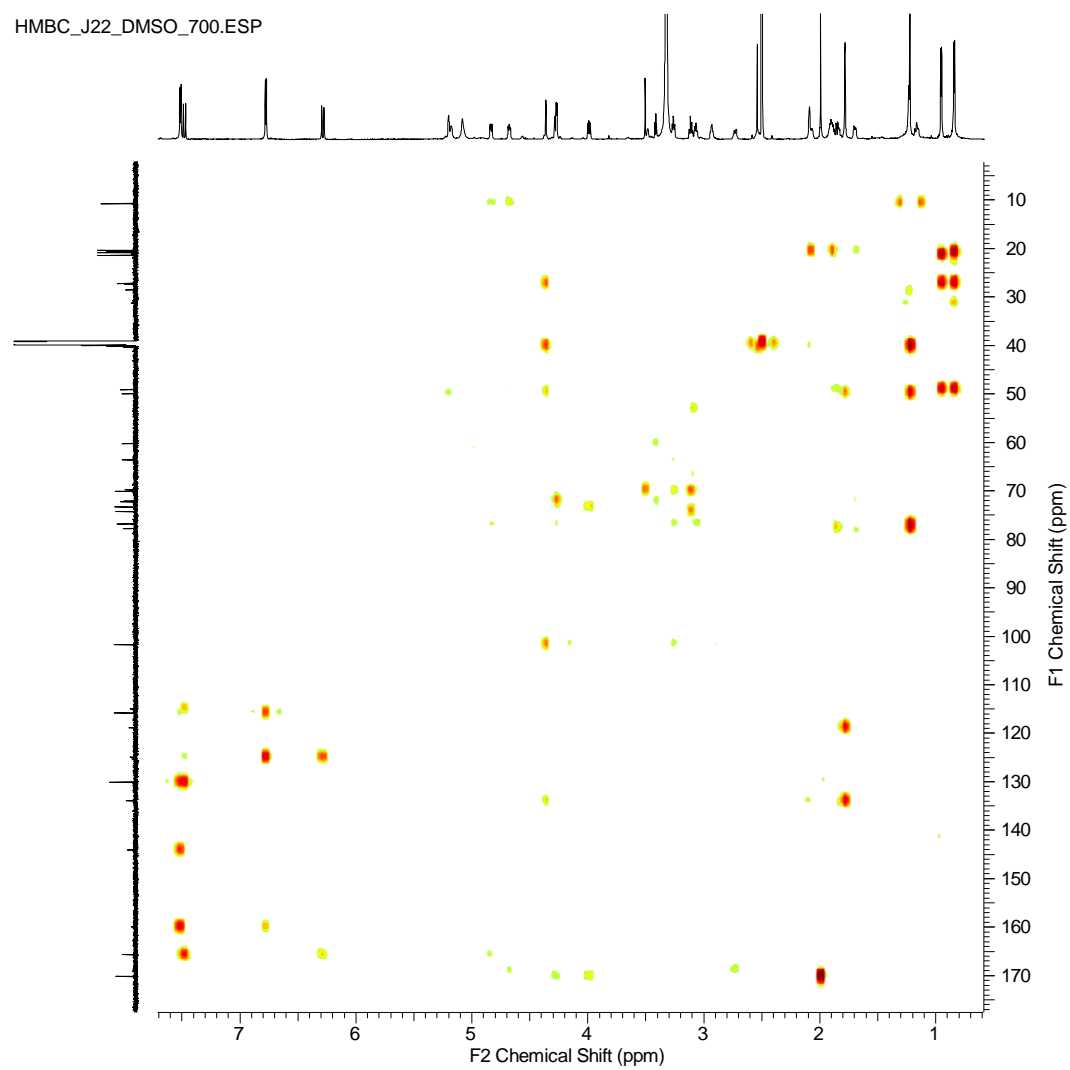

Figure S19. COSY spectrum (700 MHz, DMSO-*d*<sub>6</sub>) of the new compound **2**.

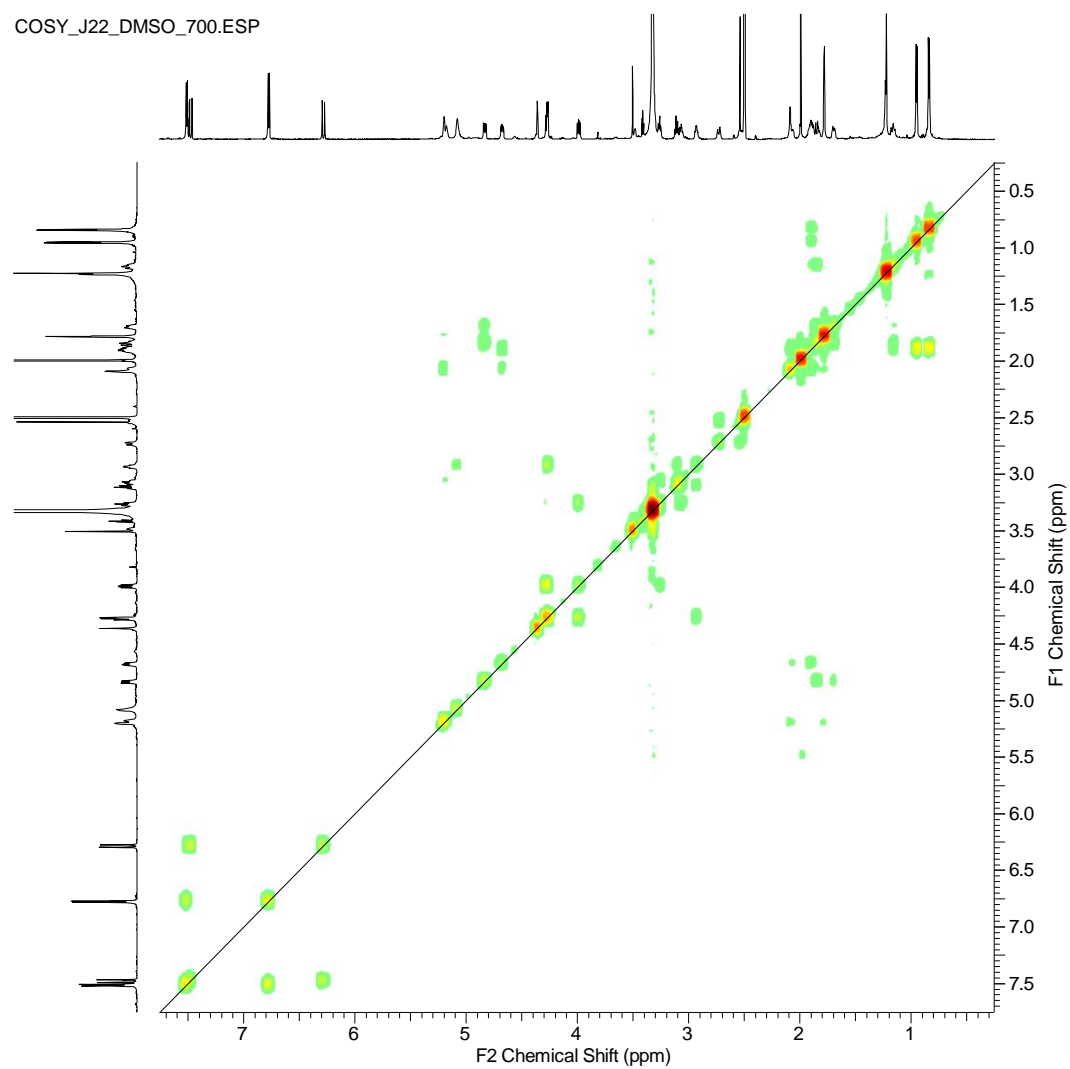

Figure S20. HRESIMS spectrum of the new compound **3**.

**Multiple Mass Analysis: 2 mass(es) processed**

Tolerance = 5.0 PPM / DBE: min = -1.5, max = 20.0

Element prediction: Off

Number of isotope peaks used for i-FIT = 5

Monoisotopic Mass, Even Electron Ions

385 formula(e) evaluated with 1 results within limits (up to 20 closest results for each mass)

Elements Used:

C: 0-100 H: 0-200 O: 0-50 Na: 0-1

20191216\_SeoYH\_Gyko7F-J17\_pos\_re 244 (2.743)

1: TOF MS ES+

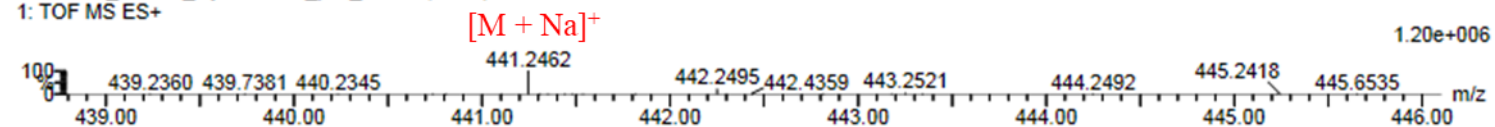

Minimum: 15.00  
Maximum: 100.00

| Mass | RA | Calc. Mass | mDa | PPM | DBE | i-FIT | Norm | Conf(%) | Formula |
|------|----|------------|-----|-----|-----|-------|------|---------|---------|
|------|----|------------|-----|-----|-----|-------|------|---------|---------|

|          |        |          |      |      |     |       |     |     |               |
|----------|--------|----------|------|------|-----|-------|-----|-----|---------------|
| 441.2462 | 100.00 | 441.2464 | -0.2 | -0.5 | 2.5 | 145.5 | n/a | n/a | C21 H38 O8 Na |
|----------|--------|----------|------|------|-----|-------|-----|-----|---------------|

Figure S21.  $^1\text{H}$  NMR spectrum (600 MHz, methanol- $d_4$ ) of the new compound **3**.

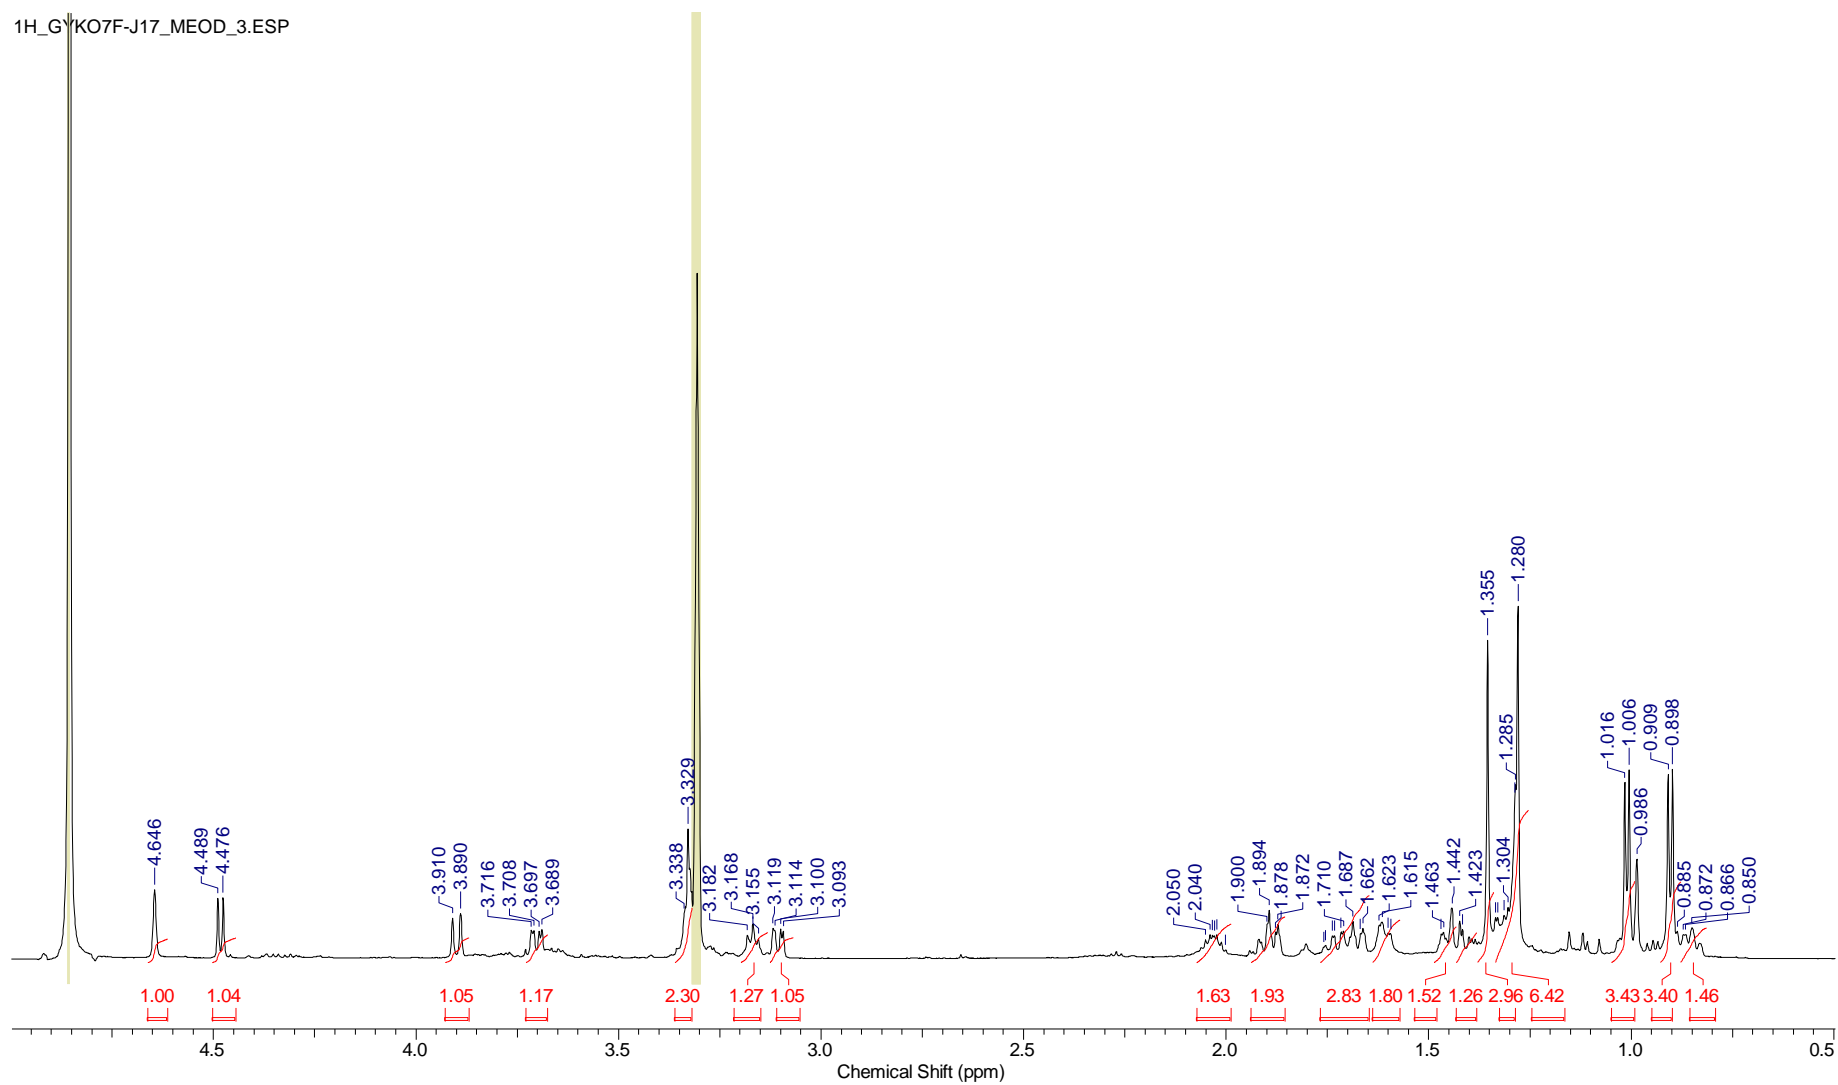



Figure S22.  $^{13}\text{C}$  NMR spectrum (150 MHz, methanol- $d_4$ ) of the new compound **3**.

13C\_GYKO7F-J17\_MEOD\_3.ESP

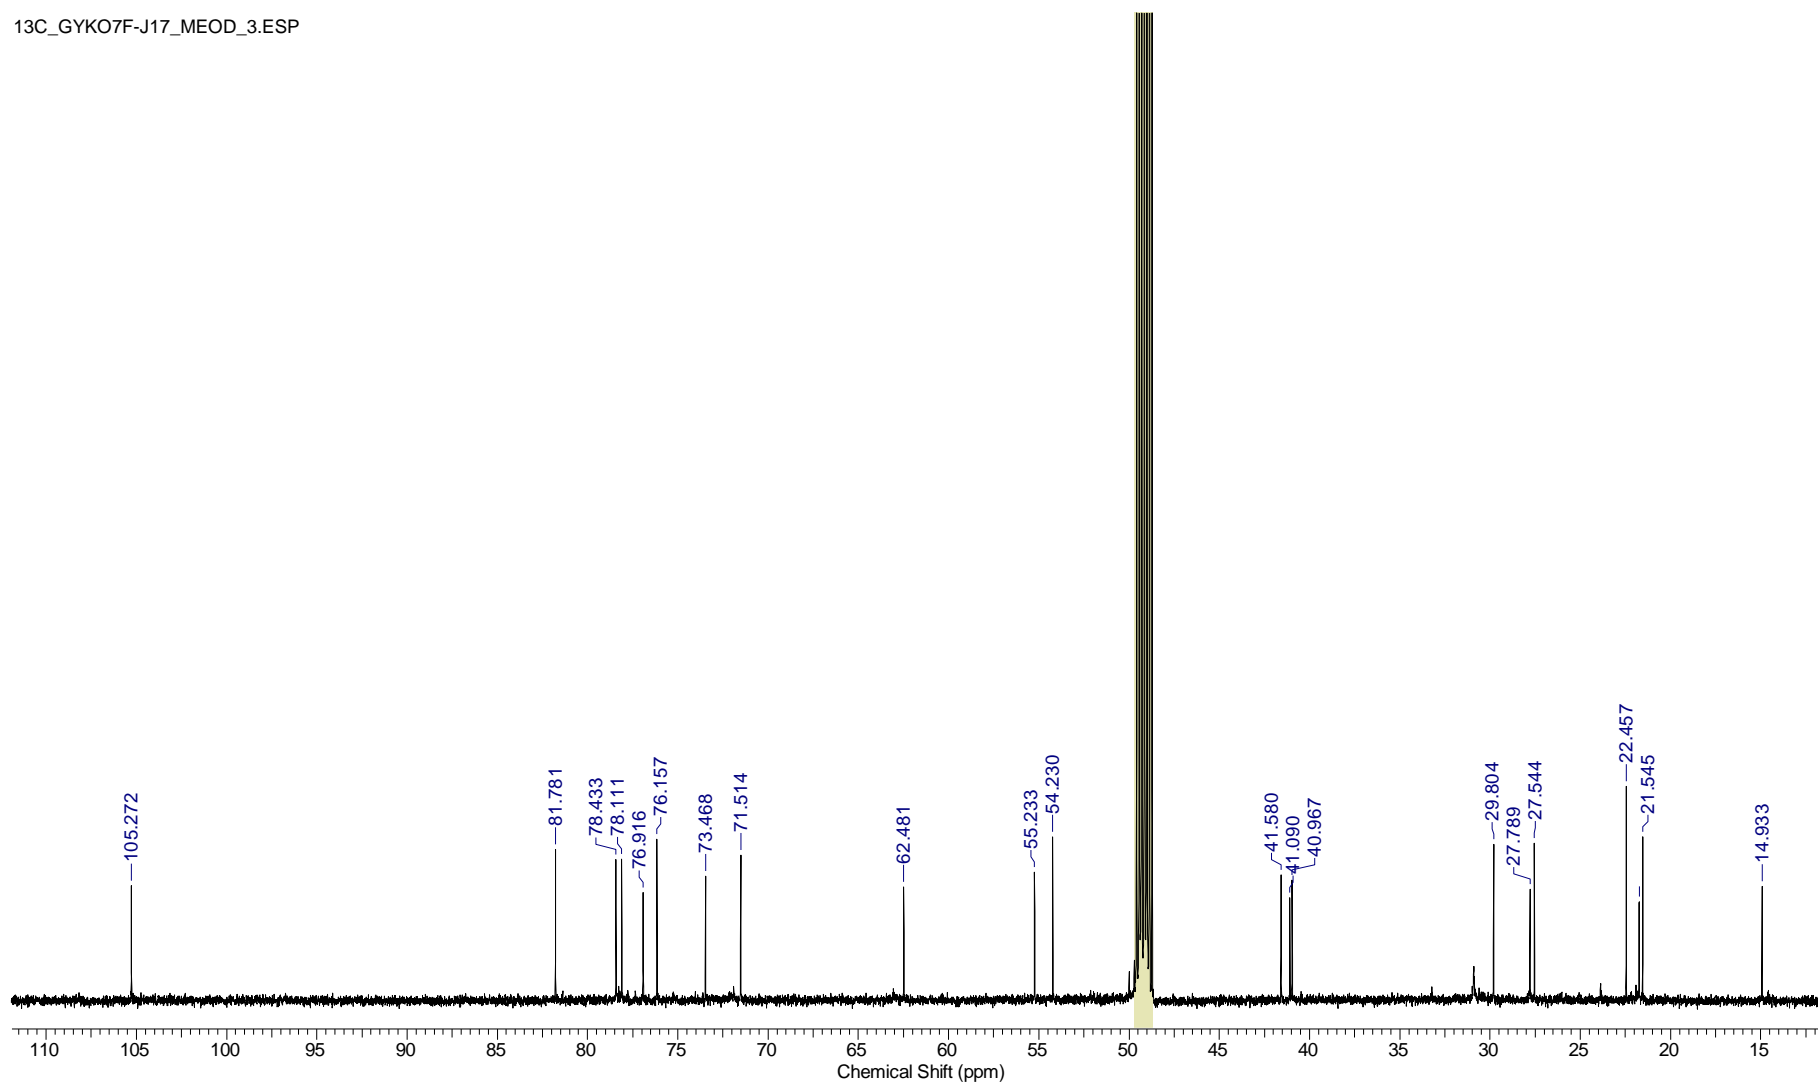

Figure S23. HSQC spectrum (600 MHz, methanol-*d*<sub>4</sub>) of the new compound **3**.

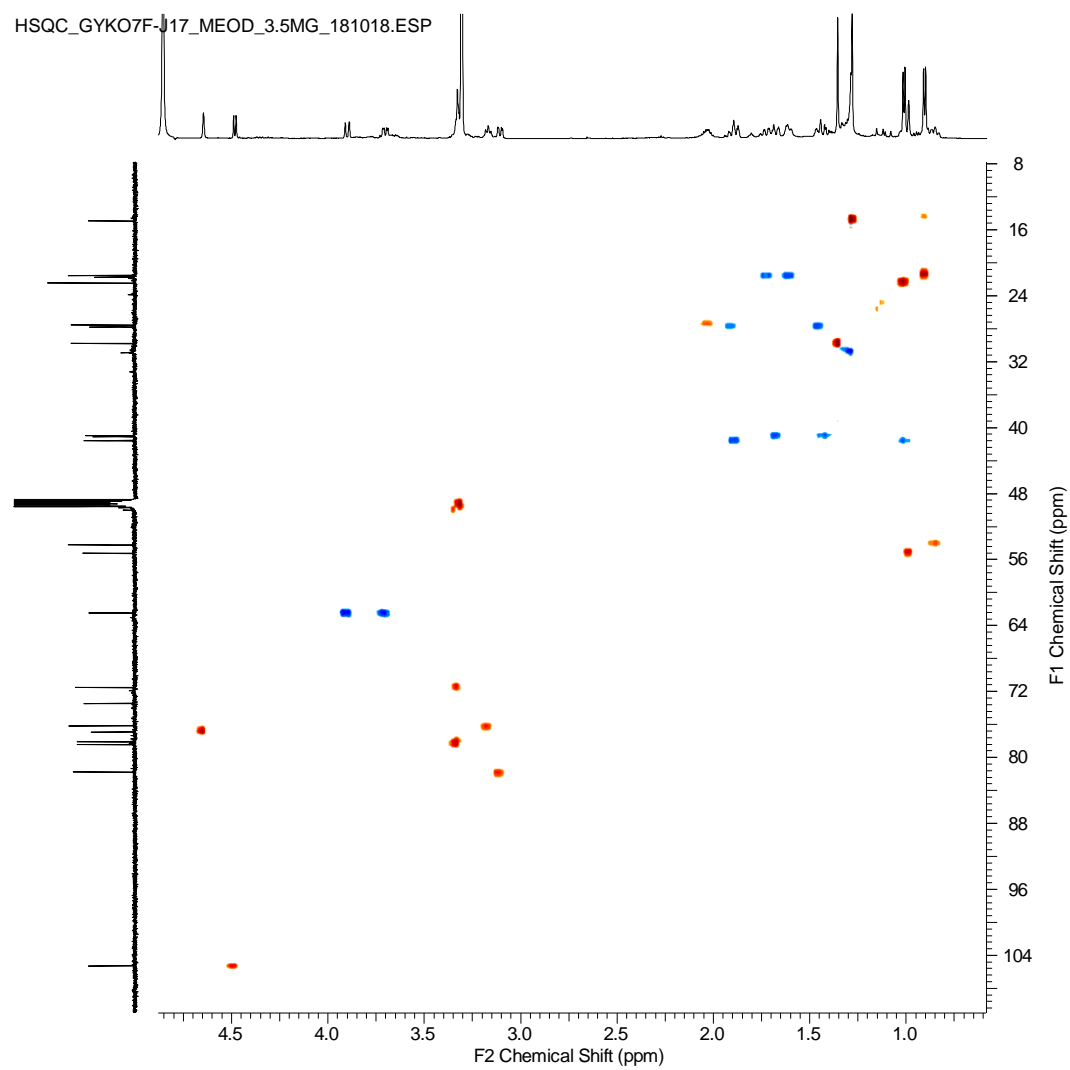

Figure S24. HMBC spectrum (600 MHz, methanol-*d*<sub>4</sub>) of the new compound **3**.

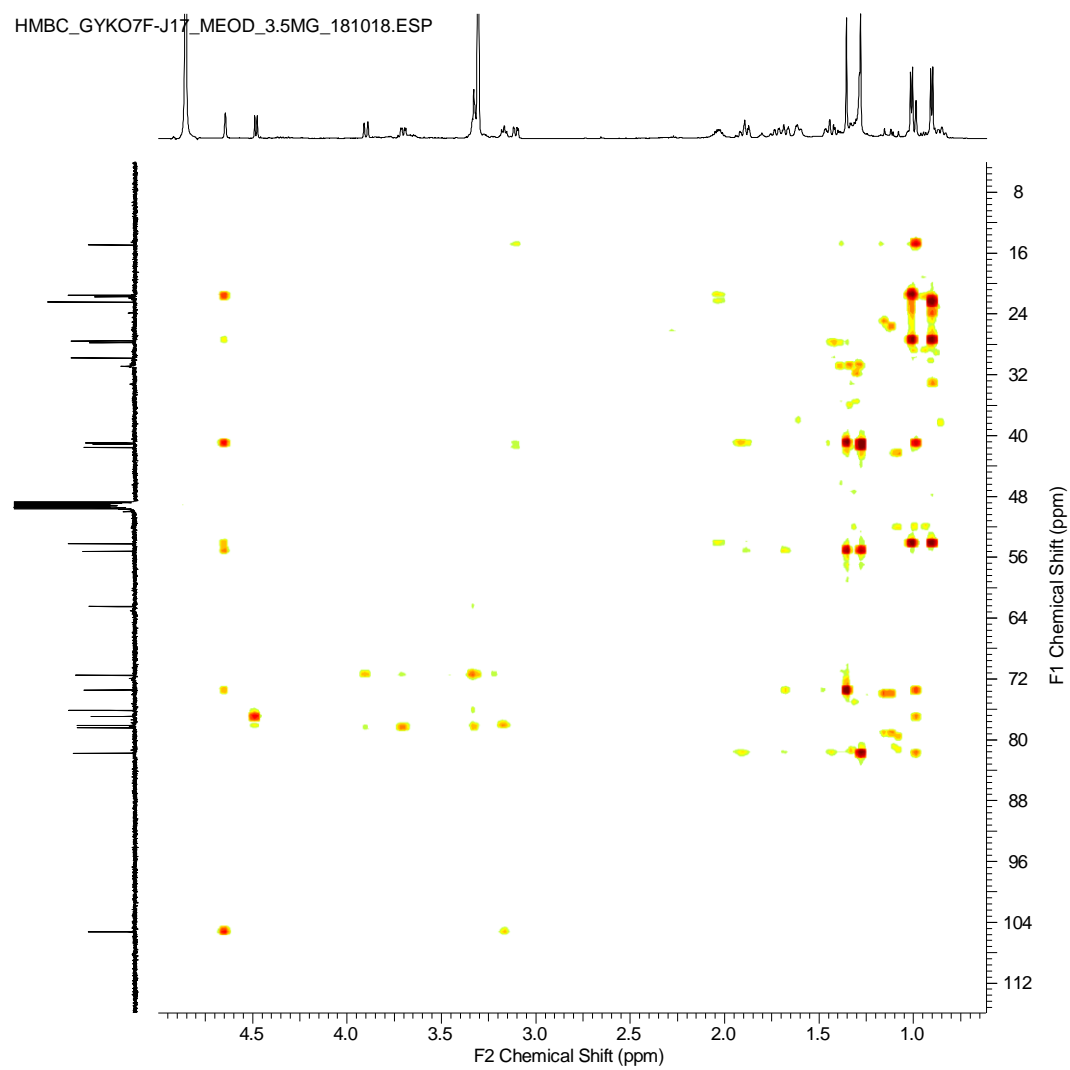

Figure S25. COSY spectrum (600 MHz, methanol-*d*<sub>4</sub>) of the new compound **3**.

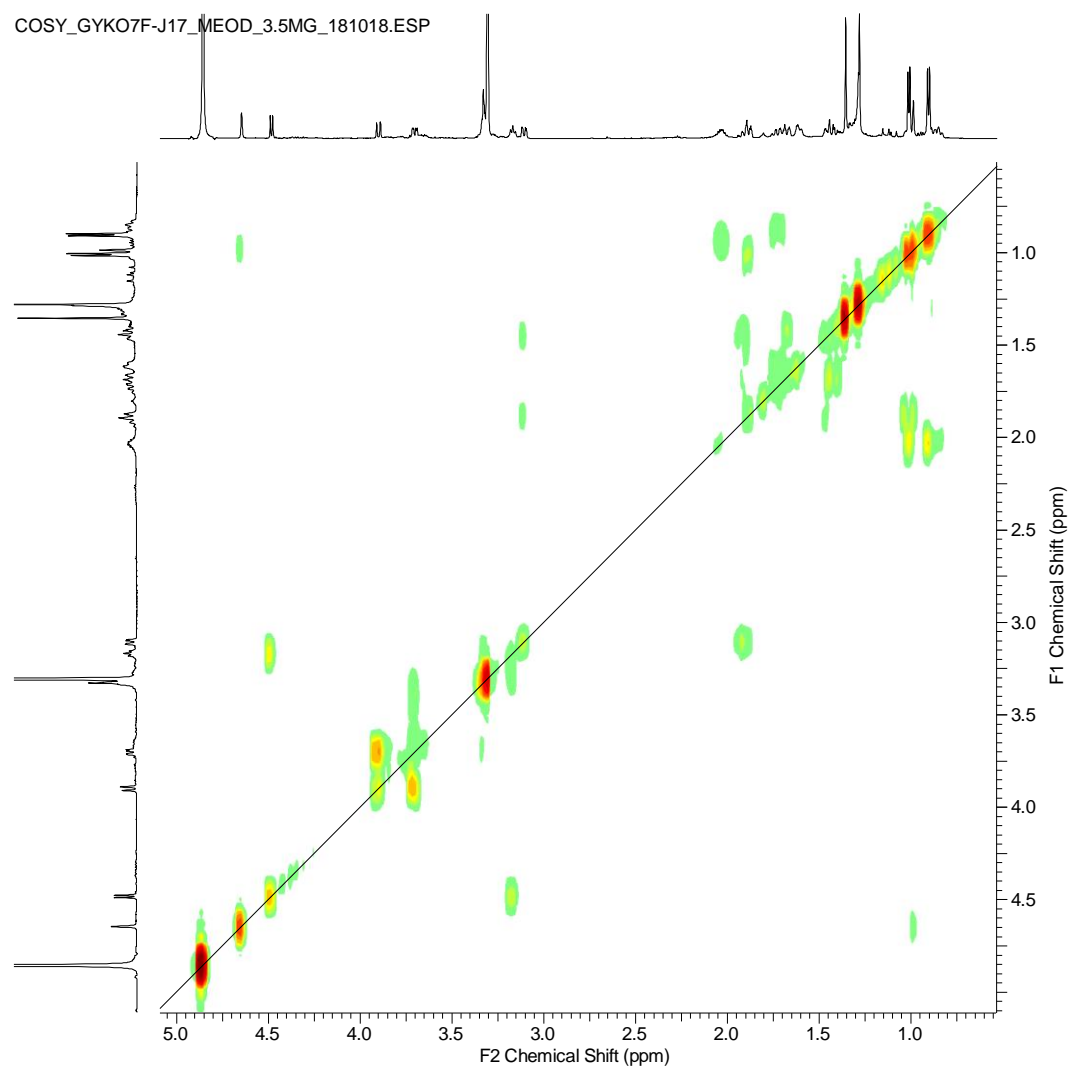

Figure S26. NOESY spectrum (600 MHz, methanol- $d_4$ ) of the new compound **3**.

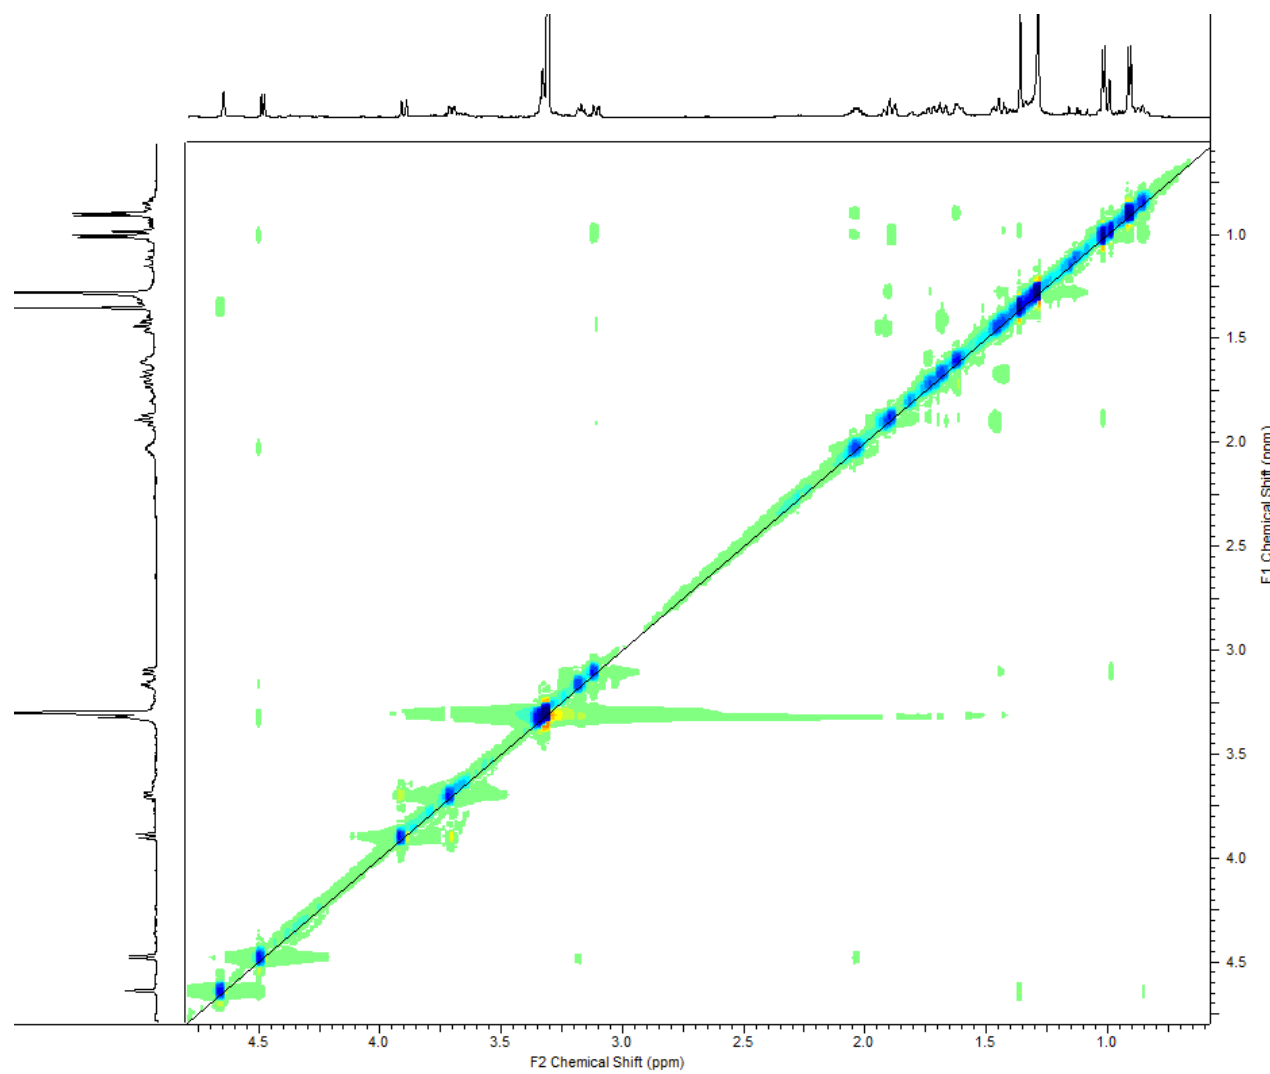

Figure S27. HRESIMS spectrum of the new compound 4.

**Multiple Mass Analysis: 2 mass(es) processed**

Tolerance = 5.0 PPM / DBE: min = -1.5, max = 20.0

Element prediction: Off

Number of isotope peaks used for i-FIT = 5

Monoisotopic Mass, Even Electron Ions

652 formula(e) evaluated with 2 results within limits (up to 20 closest results for each mass)

Elements Used:

C: 0-100 H: 0-200 O: 0-50 Na: 0-1

20191216\_SeoYH\_Gyko7F-J19\_pos\_re 231 (2.600)

1: TOF MS ES+

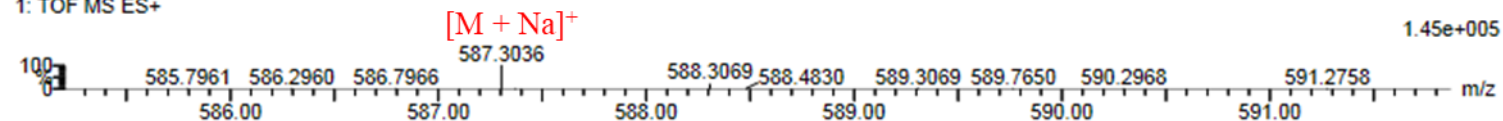

Minimum: 15.00  
Maximum: 100.00

| Mass     | RA     | Calc. Mass | mDa  | PPM  | DBE  | i-FIT | Norm  | Conf(%) | Formula        |
|----------|--------|------------|------|------|------|-------|-------|---------|----------------|
| 587.3036 | 100.00 | 587.3009   | 2.7  | 4.6  | 15.5 | 63.1  | 1.273 | 28.00   | C36 H43 O7     |
|          |        | 587.3043   | -0.7 | -1.2 | 3.5  | 62.1  | 0.328 | 72.00   | C27 H48 O12 Na |

Figure S28.  $^1\text{H}$  NMR spectrum (600 MHz, methanol- $d_4$ ) of the new compound **4**.

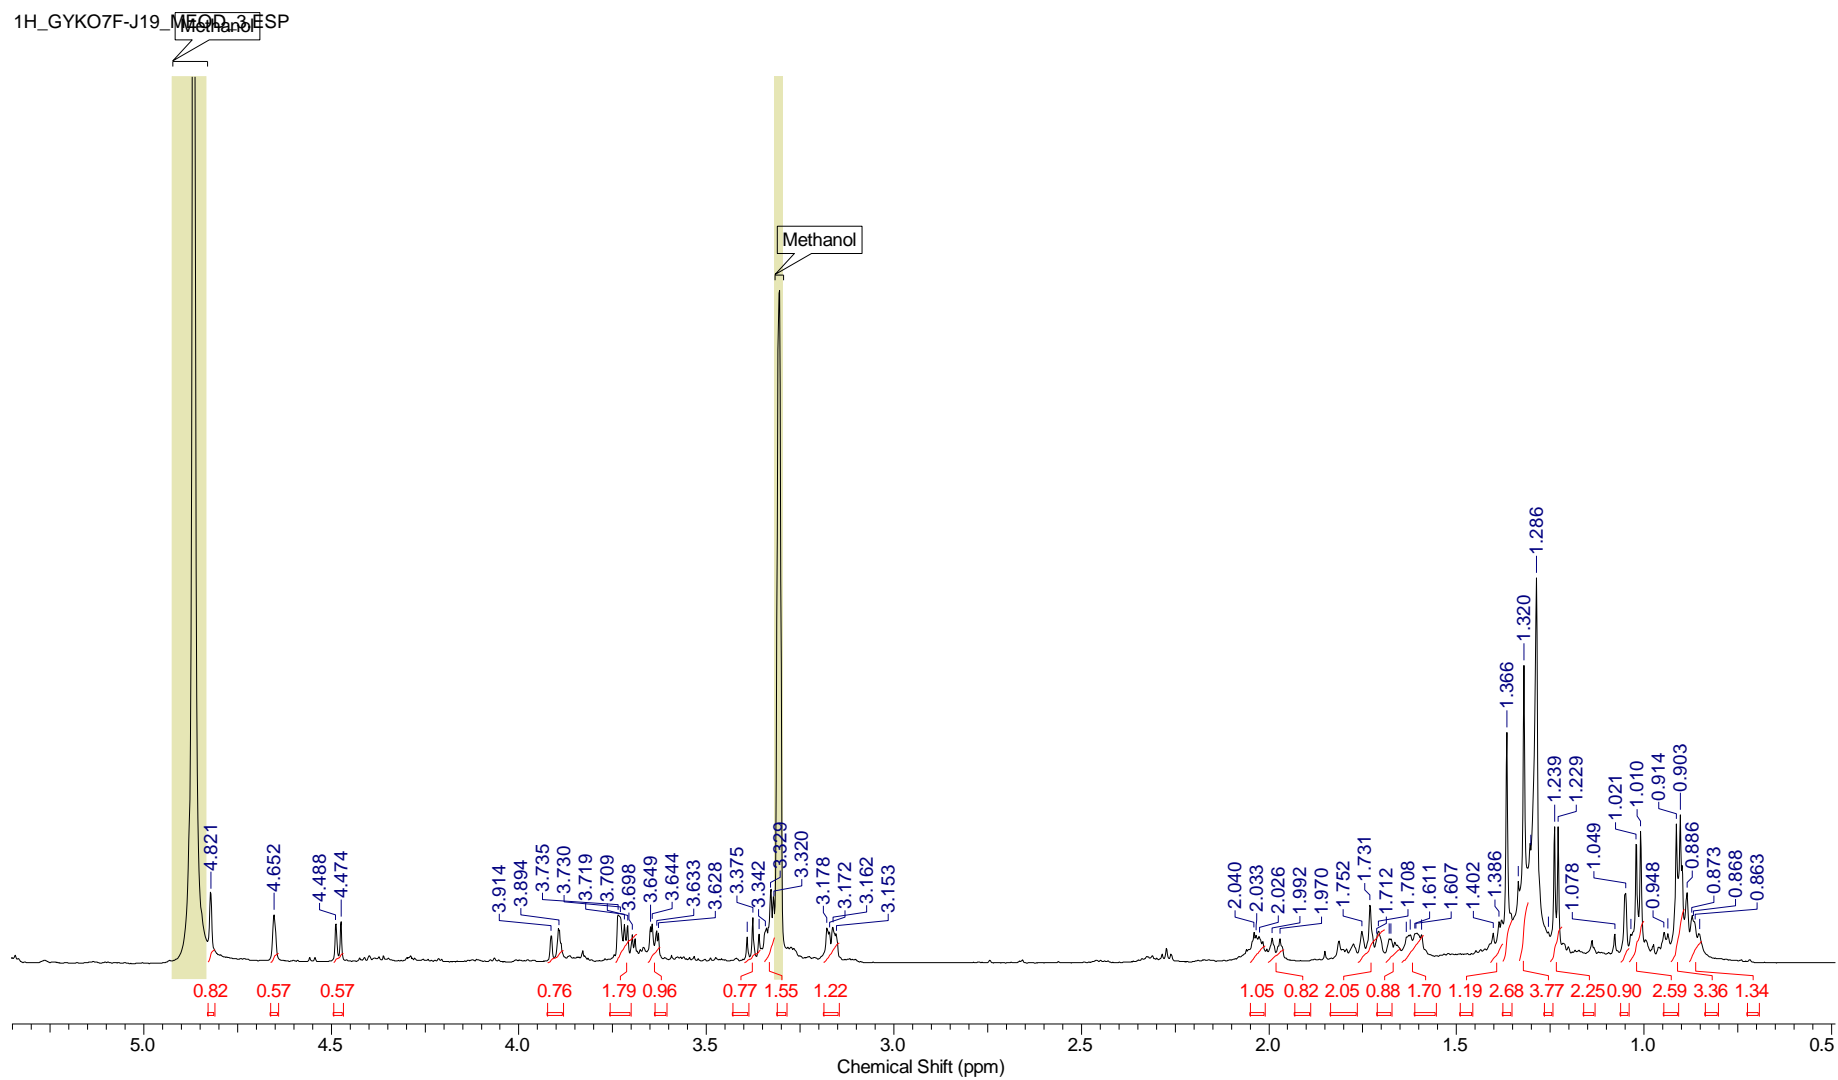

Figure S29.  $^{13}\text{C}$  NMR spectrum (150 MHz, methanol- $d_4$ ) of the new compound **4**.

13C\_GYKO7F-J19\_MEOD\_3.ESP

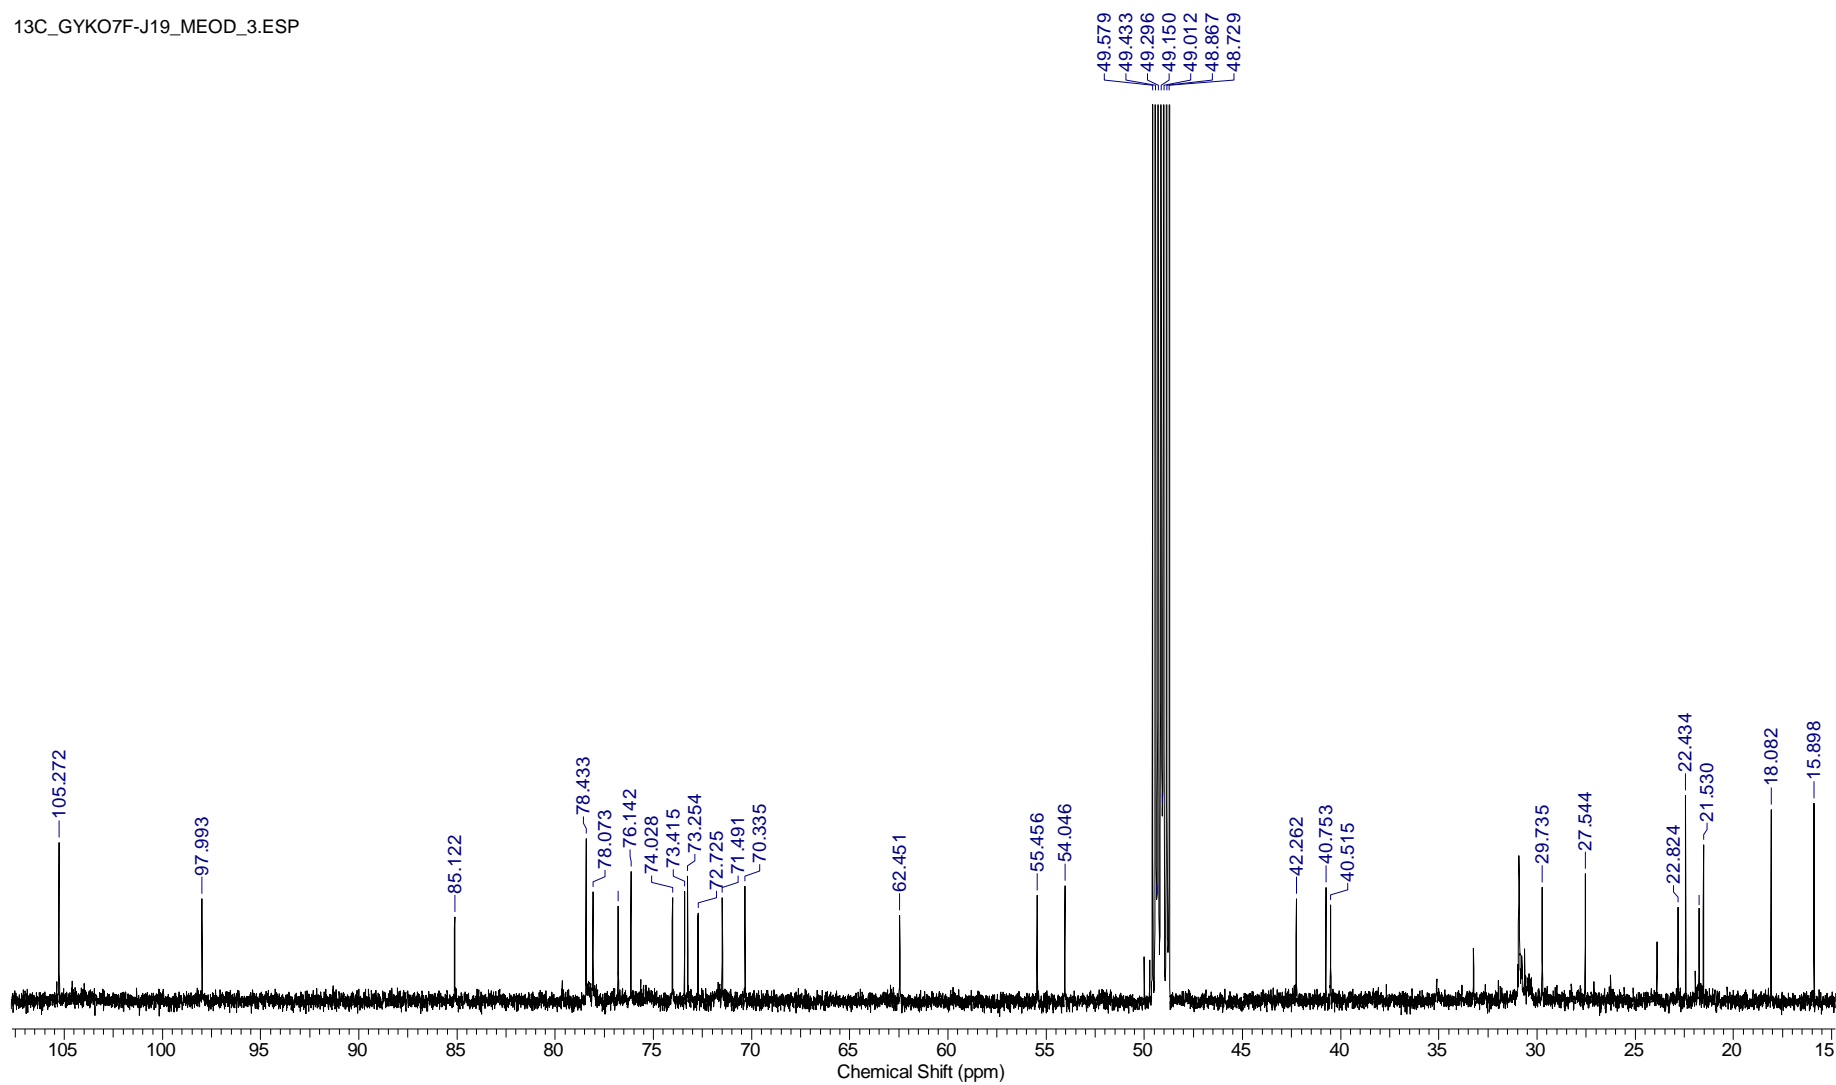



Figure S30. HSQC spectrum (600 MHz, methanol- $d_4$ ) of the new compound 4.

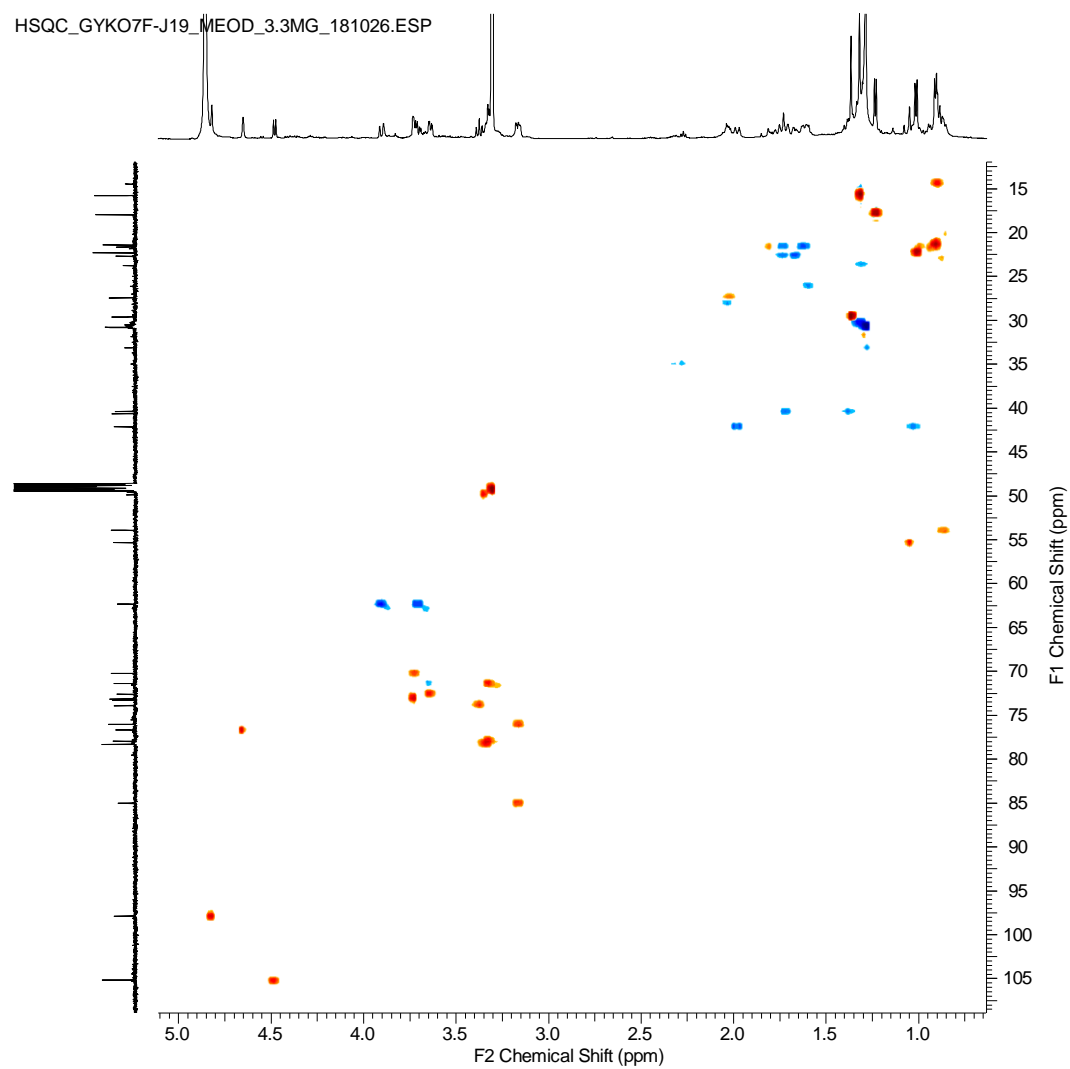

Figure S31. HMBC spectrum (600 MHz, methanol-*d*<sub>4</sub>) of the new compound **4**.

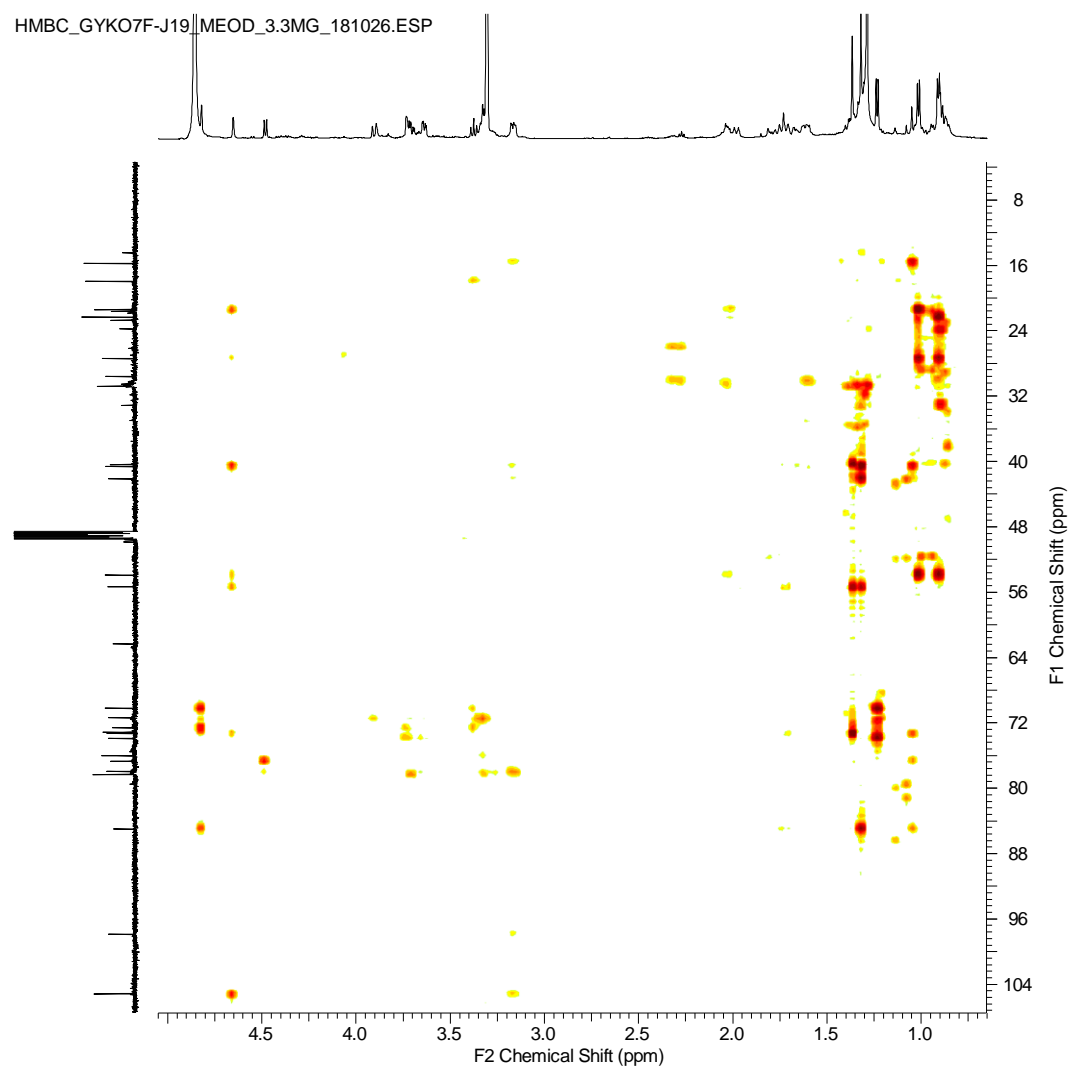

Figure S32. COSY spectrum (600 MHz, methanol-*d*<sub>4</sub>) of the new compound **4**.

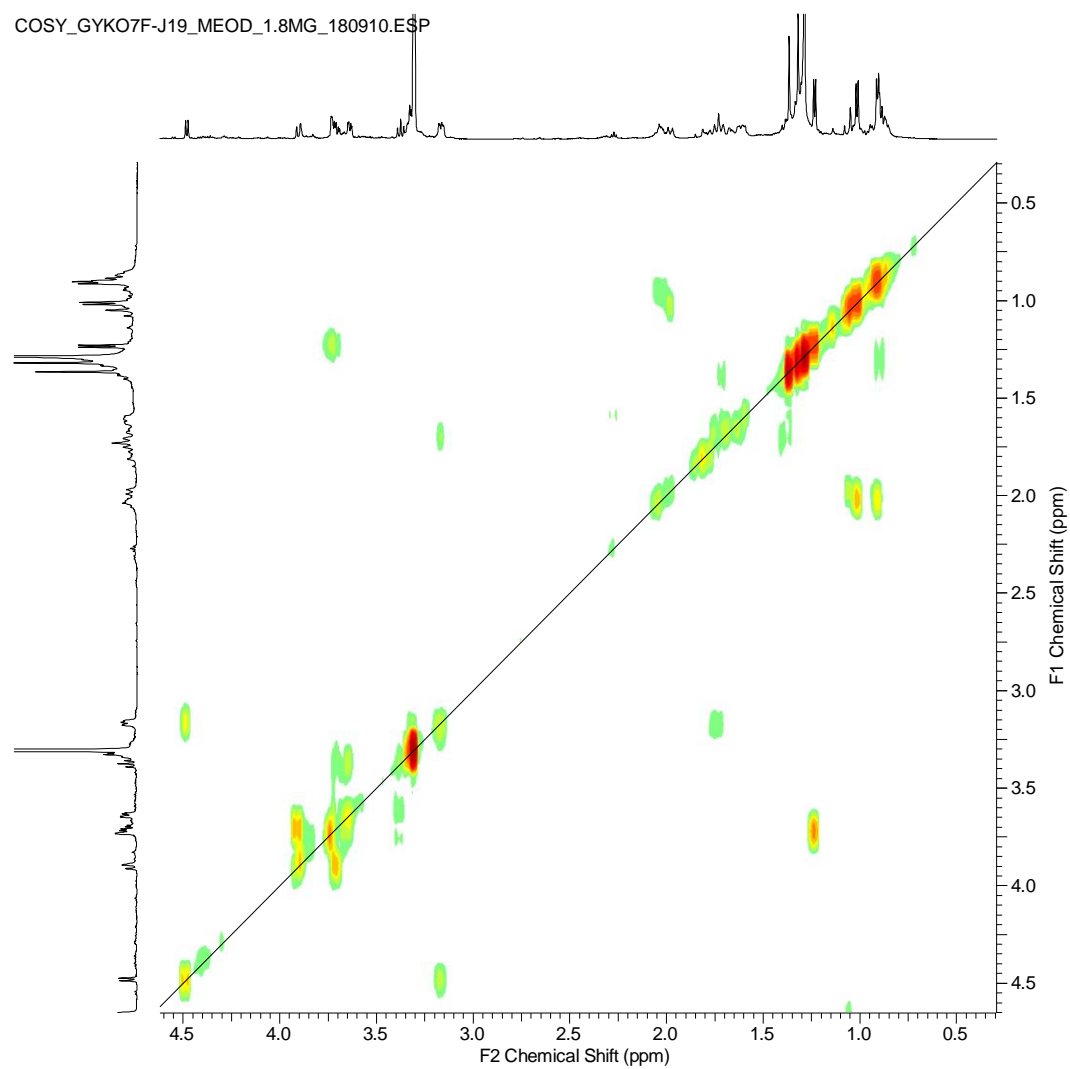

Figure S33. NOESY spectrum (600 MHz, methanol- $d_4$ ) of the new compound **4**.

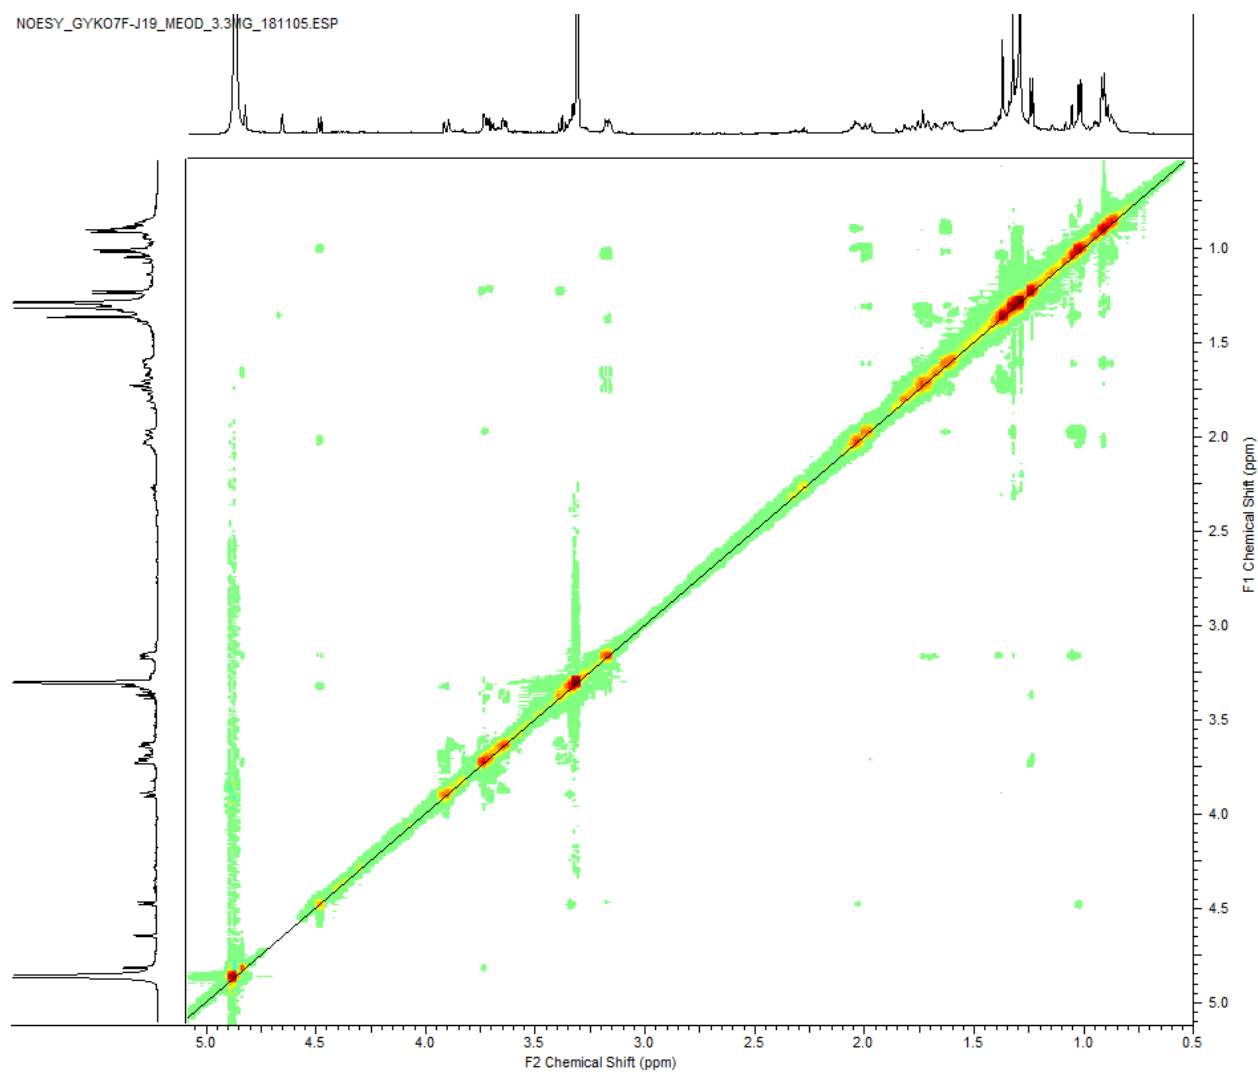

Supplement: s1 [file s1]
